1                                    Shared and Distinct Genetic Risk Factors  
2                                    for Childhood Onset and Adult Onset Asthma

3  
4 Milton Pividori, PhD<sup>1,^</sup>, Nathan Schoettler, MD, PhD<sup>1,2,^</sup>, Dan L. Nicolae, PhD<sup>1,2,3</sup>, Carole  
5 Ober, PhD<sup>2,§</sup>, Hae Kyung Im, PhD<sup>1,2,§</sup>

6  
7 Departments of Medicine<sup>1</sup>, Human Genetics<sup>2</sup> and Statistics<sup>3</sup>, The University of Chicago,  
8 Chicago, IL

9  
10 <sup>^</sup>These authors contributed equally.

11  
12 <sup>§</sup>Corresponding Authors:

13 H.K.I. [haky@uchicago.edu](mailto:haky@uchicago.edu)

14 C.O. [c-ober@genetics.uchicago.edu](mailto:c-ober@genetics.uchicago.edu)

15

16

17

## 18 **Background**

19 Childhood and adult onset asthma differ with respect to severity and co-morbidities.  
20 Whether they also differ with respect to genetic risk factors has not been previously  
21 investigated.

## 22 **Methods**

23 We used data from the UK Biobank to conduct genome-wide association studies  
24 (GWASs) in 9,433 childhood onset asthma (onset before age 12) and 21,564 adult  
25 onset asthma (onset between ages 26 and 65) cases, each compared to 318,237 non-  
26 asthmatic controls (older than age 38), and for age of onset in 37,846 asthma cases.  
27 Enrichment studies determined the tissues in which genes at GWAS loci were most  
28 highly expressed, and PrediXcan, a transcriptome-wide gene-based test, was used to  
29 identify candidate risk genes.

## 30 **Findings**

31 We detected 61 independent asthma loci: 23 were childhood onset specific, one was  
32 adult onset specific, and 37 were shared. Nineteen loci were associated with age of  
33 asthma onset. Genes at the childhood onset loci were most highly expressed in skin,  
34 blood and small intestine; genes at the adult onset loci were most highly expressed in  
35 lung, blood, small intestine and spleen. PrediXcan identified 113 unique candidate  
36 genes at 22 of the 61 GWAS loci.

## 37 **Interpretation**

38 Genetic risk factors for adult onset asthma are largely a subset of the genetic risk for  
39 childhood onset asthma but with overall smaller effects, suggesting a greater role for  
40 non-genetic risk factors in adult onset asthma. In contrast, the onset of disease in  
41 childhood is associated with additional genes with relatively large effect sizes.  
42 Combined with gene expression and tissue enrichment patterns, we suggest that the  
43 establishment of disease in children is driven more by allergy and epithelial barrier  
44 dysfunction whereas the etiology of adult onset asthma is more lung-centered, with  
45 immune mediated pathways driving disease progression in both children and adults.

46

#### 47 **Funding**

48 This work was supported by the National Institutes of Health grants R01 MH107666 and  
49 P30 DK20595 to H.K.I., R01 HL129735, R01 HL122712, P01 HL070831, and UG3  
50 OD023282 to C.O.; N.S. was supported by T32 HL007605.

51

52

53 Key Words: asthma GWAS, adult onset asthma, childhood onset asthma,  
54 transcriptome, UK Biobank

55

## 56 **Introduction**

57 Asthma is the most prevalent chronic respiratory disease worldwide<sup>1</sup>. Its diagnosis is  
58 based on the presence of reversible airflow obstruction and clinical symptoms that  
59 include wheeze, cough, and shortness of breath. Despite these shared features, asthma  
60 is likely many different conditions. In particular, childhood onset asthma and adult onset  
61 asthma differ with respect to sex ratios, triggers of exacerbation, associated co-  
62 morbidities, severity<sup>2,3</sup>, and potentially also for genetic risk factors<sup>4,5</sup>. For example, the  
63 most replicated and significant genome-wide association study (GWAS) single  
64 nucleotide polymorphisms (SNPs) at the 17q12-21 locus are specific to asthma with  
65 onset of symptoms in early life<sup>6</sup>. Only one asthma GWAS to date was performed in adult  
66 onset cases. The GABRIEL Consortium included 1,947 cases with adult onset asthma  
67 (defined as 16 years of age or older) and 3,669 adult controls<sup>7</sup>. Overall, genome-wide  
68 significant variants in the combined sample of 10,365 cases and 16,110 controls  
69 revealed larger odds ratios (ORs) in the childhood onset group compared to the adult  
70 onset group, but no loci reached significance in the adult onset cases, likely due to low  
71 power. It remains unknown, therefore, whether loci other than 17q12-21 contribute  
72 specifically to childhood onset or adult onset asthma. Delineating genetic risk factors  
73 affecting age of onset from those that are shared between childhood and adult onset  
74 asthma could provide insights into the molecular mechanisms contributing to different  
75 clinical manifestations of asthma that is diagnosed at different ages.

76 To address this question and directly compare genetic risk architectures of adult  
77 onset and childhood onset asthma, we leveraged the U.K. Biobank (UKB), a large-scale  
78 prospective study collecting demographic, clinical, medical history, and genetic data for

79 nearly 500,000 participants<sup>8</sup>. We performed asthma GWASs in 9,433 adults with a  
80 diagnosis of asthma before age 12 years (childhood onset cases) and 21,564 adults  
81 with a diagnosis of asthma between age 26 and 65 years (adult onset cases), each  
82 compared to 318,237 adults (>38 years) who did not have a diagnosis of asthma or  
83 chronic obstructive lung disease (COPD) (controls). In addition, we conducted an age of  
84 onset GWAS in 37,846 asthma cases. Our goals were to identify shared and distinct  
85 genetic risk loci for childhood and adult onset asthma, and to identify genes that may  
86 mediate the effects of associations at age of onset specific loci and those shared  
87 between childhood and adult onset asthma.

88

## 89 **Methods**

### 90 Sample composition and case definitions

91 Data for 376,358 British white individuals from the UKB data release July 2017 were  
92 used<sup>8</sup>. We extracted disease status (asthma, allergic rhinitis, atopic dermatitis (AD),  
93 food allergy, COPD, emphysema, chronic bronchitis), age of onset of asthma, and sex  
94 from self-reported questionnaires and hospital records (ICD10 codes) by querying our  
95 in-house protected UKB database server. See our 'reproducible research' and other  
96 details in the appendix (pp. 3-12).

97 We defined childhood and adult onset asthma using strict age of onset criteria  
98 that would minimize the likelihood of misclassification, and considered asthma cases  
99 with onset < 12 years of age as childhood onset cases (n=9,433) and with onset > 25  
100 and before 66 years of age as adult onset cases (n=21,564). UKB participants without  
101 an asthma diagnosis were included as controls (n=318,237). Individuals with COPD,

102 emphysema or chronic bronchitis were excluded from adult onset cases and controls.  
103 For the age of onset GWAS, we included an additional 6,849 asthmatics with onset  
104 between the ages of 12 and 25 years of age. Characteristics of the sample are shown in  
105 Table 1. After genotype quality control, 10,894,596 variants were available for analyses.  
106 See appendix (pp. 4-5) for additional details on genotype QC and phenotype definitions.

107

### 108 Genome-wide association studies

109 We conducted a childhood onset and adult onset GWAS by logistic regression and an  
110 age of onset GWAS by linear regression, both using the allele dosages under an  
111 additive genetic model, as implemented in Hail (<https://github.com/hail-is/hail>). In all  
112 three GWASs, we included sex and the first 10 genetic principal components as  
113 covariates and used a genome-wide significance threshold of  $5 \times 10^{-8}$ . FUMA<sup>9</sup>, an  
114 integrative post-GWAS annotation web-based tool, was used to define independent risk  
115 loci and identify enriched tissues. FUMA defines independent loci using linkage  
116 disequilibrium (LD) information from the 1000 Genomes project<sup>10</sup>. We specified an  $r^2$   
117 threshold  $>0.6$  between genome-wide significant SNPs to represent a single locus.  
118 Tissue enrichments were calculated in FUMA using a hypergeometric test to determine  
119 overrepresentation of genes mapped to risk loci (by physical distance) among highly  
120 expressed genes in each tissue in GTEx relative to all others.

121 Childhood onset and adult onset specific loci were defined as those that were  
122 genome-wide significant in either the childhood onset or adult onset GWAS but were not  
123 associated with asthma at  $p < 0.05$  in other group, and the 95% confidence intervals

124 (CIs) of the respective ORs did not overlap. All other GWAS loci that were genome-wide  
125 significant in at least one of the two GWASs were considered to be shared.

126

### 127 Sensitivity analysis to adult onset misclassification

128 We performed sensitivity analysis to assess the effects of potential poor recall of age of  
129 onset among the adult onset asthmatics. In particular, to assure that the adult onset  
130 cases did not include a significant proportion of childhood onset asthma in which  
131 symptoms remitted in early life but then relapsed in adulthood. To this end, we replaced  
132 adult onset cases with increasing proportions of randomly selected childhood onset  
133 cases, and then tested for association at the two most significant childhood onset  
134 specific loci. This procedure was repeated 20 times for each proportion to quantify the  
135 sampling variability (appendix pp. 8-10).

136

### 137 Predicted transcriptome association test

138 We used the PrediXcan<sup>11</sup> framework to identify genes that may mediate associations  
139 between genetic variants and asthma risk. PrediXcan is a software tool that estimates  
140 tissue-specific gene expression profiles from an individual's SNP genotype profile using  
141 prediction models trained in large references databases of genotypes and tissue-  
142 specific gene expression profiles. Using these genotype-imputed expression profiles,  
143 PrediXcan can perform gene-based association tests that correlate predicted  
144 expression levels with phenotypes (e.g., asthma) to identify candidate causal genes  
145 from GWAS data. We used a summary version of PrediXcan, which has high  
146 concordance with the individual level version ( $R^2 > 0.99$ )<sup>12</sup>. For predictions, we

147 downloaded elastic net models trained with reference transcriptome data from the GTEx  
148 consortium<sup>13</sup> (<http://predictdb.org>) for 49 tissues (appendix Table 1).

149 PrediXcan was run separately in the childhood onset and adult onset cases,  
150 each with the same controls. Significance was determined using a Bonferroni correction  
151 for the 38,608 genes ( $p < 1.29 \times 10^{-6}$ ) that were expressed in the five tissues determined  
152 by FUMA to be enriched (skin, lung tissue, whole blood, small intestine and spleen; see  
153 Results). We defined childhood onset specific genes as those whose predicted  
154 expression is significantly associated with childhood onset asthma and the variants that  
155 predict their expression are within childhood onset specific loci. Adult onset specific  
156 genes were similarly defined. Because SNPs at shared loci may predict the expression  
157 of genes that are associated only in childhood onset or adult onset cases, we also  
158 considered genes to be age of onset specific if they were significantly associated with  
159 asthma at  $p < 1.29 \times 10^{-6}$  in one age group and not associated with asthma at  $p < 0.05$  in  
160 the other. All other genes were considered shared.

161

## 162 Results

### 163 Genome-wide association studies of asthma

164 We first conducted GWASs of childhood onset and adult onset asthma. These studies  
165 revealed 61 independent loci associated with asthma, 52 were significant in the  
166 childhood onset asthma GWAS and 19 were significant in the adult onset asthma  
167 GWAS ( $p < 5 \times 10^{-8}$ ) (Figure 1). Thirty-one of the 61 loci, in 30 chromosomal regions, were  
168 not previously reported in the GWAS catalog or in a recent large GWAS of asthma<sup>14,15</sup>.  
169 Among the 31 new loci, 17 were significant in the childhood onset GWAS, one was



170 significant in the adult onset GWAS, and 13 were significant in both (Table 1). Some of  
171 these loci contained genes that have been associated with asthma in candidate gene  
172 studies (e.g., *TLR10*<sup>16</sup> and *TLR6*<sup>17,18</sup> in the childhood onset GWAS; *FADS2*<sup>19</sup>,  
173 *MUC5AC*<sup>20,21</sup> and *TBX21*<sup>22</sup> in both GWASs), which provide independent validation of  
174 our GWAS findings.

175 As in previous GWASs comprised largely of children, the most significant locus in  
176 the childhood onset GWAS is at 17q12<sup>23</sup>, with the lead SNP in the *GSDMB* gene  
177 (Figure 1A). However, the estimated ORs for the lead SNPs at three other loci were  
178 similar to or larger than the lead SNP at the 17q locus. The lead SNPs in *IL1RL1* at  
179 2q12.1 and in *EMSY* at 11q13.5 had effect sizes on childhood onset asthma similar to  
180 the lead SNP in *GSDMB* on 17q (Table 1). Both loci have been prominent in previous  
181 asthma GWAS. The lead SNP at the 1q21.3 locus, corresponding to a nonsense  
182 mutation (R501X) in the filaggrin (*FLG*) gene at 1q21.3, had the largest OR overall.  
183 Variants in *FLG* have been robustly associated with food allergies<sup>24-26</sup> and AD<sup>27-29</sup>, but  
184 previous associations with asthma have been in the context of other allergic  
185 conditions<sup>15,30</sup>. Whether variants in *FLG* are associated with risk for childhood onset  
186 asthma independent of its effects on early life allergic disease is yet unknown.

187 To address this possibility, we repeated the childhood onset GWAS after  
188 excluding 3,205 childhood onset cases and 5,785 controls who reported having a  
189 history of allergic rhinitis, AD or food allergy. As expected in a smaller sample the p-  
190 values were overall larger, but the ORs were strikingly similar (appendix Figure 1 and  
191 Table 2). Even though the OR at the *FLG* locus on 1q21.3 decreased from 1.97 (95% CI  
192 1.82, 2.13) to 1.61 (95% CI 1.49, 1.74), it remained both highly significant ( $p=2.45 \times 10^{-}$

193 <sup>19</sup>) and the largest OR for childhood onset. These results suggest both a critical role for  
194 the allergic diathesis in the development of asthma in childhood and a shared  
195 architecture between allergic disease and childhood onset asthma, as previously  
196 discussed<sup>30,31</sup>.

197         The most significant association in the adult onset GWAS was in the HLA region,  
198 with independent associations at the HLA-C/B (6p21.33) and HLA-DR/DQ (6p21.32) loci  
199 (Figure 1B). Compared to the childhood onset GWAS, effect sizes were quite small in  
200 adult onset cases, with ORs reaching 1.1 at only five loci (2q12.1, 6p21.33, 6p21.32,  
201 9p24.1, 10p14) (Table 2).

202         Among the 61 asthma loci, 23 were specific to childhood onset asthma and one  
203 was specific to adult onset asthma (Table 2A-B). Regional association plots for the 23  
204 loci with childhood or adult onset specific effects are shown in appendix Figure 2.  
205 Among the remaining 38 shared loci (Table 2C), mean ORs were larger in the childhood  
206 onset cases at all but six loci (permutation test  $p < 10^{-4}$ ; appendix p.10-11), indicating that  
207 both more loci contribute to childhood onset asthma and even among shared loci, effect  
208 sizes are larger in childhood onset asthma cases (Figure 2).

209         Finally, to directly test for loci associated with asthma age of onset, we  
210 conducted a third GWAS including all asthma cases in UKB who met our inclusion  
211 criteria ( $n=37,846$ ). In this analysis, 19 loci were associated with age of onset ( $p < 5 \times 10^{-8}$ )  
212 (appendix Figure 3 and Table 3). Age of onset loci overlapped with both the childhood  
213 and adult onset specific and shared loci, and asthma risk alleles were nearly all  
214 associated with earlier age of onset (Table 2; Figure 2). SNPs at the 1q21.3 locus (*FLG*)  
215 had the largest effect on age of onset, with each copy of the asthma risk allele

216 (rs61816761) associated on average with 4.57 (SE 0.43) years earlier onset compared  
217 to individuals without the risk allele ( $p=8.15 \times 10^{-27}$ ). At the 17q12 locus (rs4795399) each  
218 copy of the risk allele was associated on average with 2.29 (SE 0.13) years earlier  
219 onset compared to individuals without the risk allele ( $p=6.76 \times 10^{-65}$ ). Examples of  
220 significant age of onset effects at these and other loci are shown in Figure 3. Overall,  
221 both childhood onset specific and shared asthma risk loci were associated with younger  
222 ages of onset, and alleles at loci associated with younger ages of onset had larger  
223 effects compared to alleles at loci associated with later ages of onset.

224

#### 225 Tissue-specific expression of genes at associated loci

226 Using an unbiased approach, we asked whether the tissue-specific expression of genes  
227 that map to the 52 childhood onset loci differed from the tissue-specific expression of  
228 genes mapped to the 19 adult onset loci. Genes at childhood onset loci (Figure 1A)  
229 were most highly expressed in skin, whole blood, and small intestine (lower ileum)  
230 compared to all other tissues, whereas genes at adult onset loci (Figure 1B) were most  
231 highly expression in lung, whole blood, small intestine (lower ileum), and spleen  
232 (enrichment for higher expression,  $p < 10 \times 10^{-3}$ ) (appendix Figure 4 and Table 4). These  
233 patterns suggest both overlapping and distinct underlying pathways and mechanisms  
234 associated with asthma that begins in childhood and asthma with onset in adulthood.

235

#### 236 Predicted transcriptome-wide association test

237 To better understand molecular pathways and to narrow the list of candidate causal  
238 genes at associated loci, we focused on the five tissues that most highly expressed the

239 genes at childhood onset or adult onset loci: skin, lung tissue, whole blood, small  
240 intestine, and spleen. We used PrediXcan<sup>11</sup> to identify genes whose expression is  
241 predicted by variants associated with asthma in the childhood onset or adult onset  
242 GWAS and potentially mediate the effects of associated SNPs on asthma risk.

243 This analysis identified 113 unique, candidate causal genes at 22 of the 61  
244 GWAS loci ( $p < 1.4 \times 10^{-6}$ ) (Figures 4-5) (appendix Figures 5-6 and Table 5). These  
245 included 39 genes associated with childhood onset asthma at eight of the childhood  
246 onset specific loci and 76 genes associated with childhood and/or adult onset asthma at  
247 13 of the shared loci. Variants at the one adult onset specific locus at 2q22.3 did not  
248 predict the expression of any genes in the five tissues.

249 The predicted genes most significantly associated with childhood onset asthma  
250 were at the 17q12 locus ( $Z$  score  $> 10$ ) in skin (*ORMDL3*, *ERBB2*, *PGAP3*, *GSDMA*, 2  
251 long noncoding RNAs), lung (*ORMDL3*, *GSDMB*, *GSDMA*, *PGAP3*, *PNMT*), blood  
252 (*ORMDL3*, *GSDMB*, *IKZF3*, *MED24*), small intestine (*GSDMA*, *GSDMB*, *PGAP3*), and  
253 spleen (*ORMDL3*, *GSDMB*, *ZBP2*, *MED24*). Some genes were predicted to be more  
254 highly expressed in asthmatics (e.g., *ORMDL3*, *GSDMB*, *PGAP3*, *ERBB2*), while others  
255 were predicted to be less expressed in asthmatics (e.g., *GSDMA*, *MED24*, *IKZF3*)  
256 (Figure 4A). This pattern of expression reflects the broad regulatory effects of SNPs and  
257 tissue specificity of gene expression at this locus<sup>23</sup>. The childhood onset asthma locus  
258 at 1q21.3 includes genes essential for epidermal differentiation and maintaining  
259 essential barrier function. The predicted expression of nine genes at this locus were  
260 associated with childhood onset asthma. Higher predicted expression of *CRNN*, *CRCT1*  
261 and *THEM5* in skin, of *PSDM4* in lung and blood, and of *LINGO4* in skin, lung, and

262 blood were associated with increased asthma risk. Lower predicted expression of  
263 *SPRR2D* in skin, of *S100A12* in lung and blood, of *FLG* in skin, lung and spleen, and of  
264 *TDRKH* in skin, lung, blood and spleen were associated with increased asthma risk.  
265 *S100A12* has been previously implicated in asthma<sup>32</sup> and *FLG* variants have been  
266 associated with AD and food allergies, and asthma in the context of other allergic  
267 diseases<sup>15,24-30</sup>. Other childhood onset specific genes previously implicated in asthma  
268 but not previously reported in asthma GWASs are *CCL20*<sup>33</sup> at 2q36.3 and *TLR10*<sup>16</sup> at  
269 4p14 in whole blood, and *TLR6*<sup>17,18</sup> at 4p14, *AP5B1* at 11q13.1 and *SERPINB7*<sup>34</sup> at  
270 18q21.33 in skin.

271 The 5q31.1 region had independent loci that were both childhood onset specific  
272 and shared in the GWASs. Although the predicted expression of all eight asthma genes  
273 at this extended locus were shared, five genes were more significantly associated with  
274 childhood onset asthma: higher predicted expression of *RAD50* in skin but lower  
275 predicted expression of *SEPT8* in skin and lung, *IL4* in skin, lung and blood, and *AFF4*  
276 small intestine were associated with increased risk for asthma (Figure 4B). The  
277 remaining three genes had similar associations with childhood and adult onset asthma,  
278 with predicted lower expression of *IRF1* in skin and spleen and predicted higher  
279 expression of *PDLIM4* in skin and *SLC22A5* in all five tissues associated with increased  
280 asthma risk. *IL4*, *RAD50*, *SLC22A5* and *PDLIM4* have been highlighted in previous  
281 asthma GWAS<sup>35,36</sup>, and *KIF3A* was identified in a GWAS of the atopic march<sup>37</sup> and  
282 associated with childhood onset asthma in a candidate gene study<sup>38</sup>.

283 In contrast to all other loci, predicted expression of 44 genes at two independent  
284 shared loci in the HLA region (6p21.32 and 6p21.33; referred to as the HLA region from

285 hereon in) were associated with childhood asthma only (n=1; in skin and lung), adult  
286 onset asthma only (n=3; in skin only), or both (n=39; in multiple tissues). (Figure 5). The  
287 sheer number of genes in this region with predicted expression associated with asthma,  
288 the generally broad tissue expression patterns, and three associated with asthma only  
289 in adult onset cases are consistent with this locus being among the two most significant  
290 loci in nearly all asthma GWASs, and the most significant locus in a previous small  
291 GWASs of adult onset asthma<sup>7</sup> and in adults with asthma<sup>36,39</sup>.

292         Among the remaining 37 shared loci (Figure 2B), SNPs at 12 predicted the  
293 expression of 23 unique genes, all of which were associated with both childhood onset  
294 and adult onset asthma. These include *IL18R1*, *IL18RAP*, and *ILRL2* at 2q12.1 in  
295 multiple tissues, *TSLP* at 5q22.1 in skin, *SMAD3* at 15q22.33 in skin and blood, *LRP1* at  
296 12q13.3 in skin, *IL4R* at 16p12.1 in blood, and *CLEC16A* at 16p13.13 in lung. Loci  
297 associated with *IL18R1*, *IL18RAP*, *IL18RAP*, *ILRL2*, *TSLP*, *SMAD3*, *LRP1*, *IL4R* and  
298 *CLEC16A* were reported in previous asthma GWAS<sup>15,35,40</sup>.

299

## 300 Discussion

301 This study is the first large GWAS of age of onset of asthma to include both childhood  
302 and adult onset cases. These GWASs revealed 61 independent asthma loci, 23 specific  
303 to childhood onset, one specific to adult onset, and 37 shared; with overall larger effect  
304 sizes for childhood onset asthma at nearly all loci. Moreover, the predicted expression  
305 of 41 of the 113 implicated genes were associated specifically with childhood onset  
306 asthma, compared to the predicted expression of three genes associated specifically  
307 with adult onset asthma. Our findings of more childhood onset asthma loci and

308 potentially causal genes and the larger effect sizes of risk alleles in childhood onset  
309 cases are particularly striking given that there were nearly 2.5-times more adult onset  
310 than childhood onset cases in this study. Thus, despite having substantially less power  
311 to detect loci specific to childhood onset asthma, our analyses revealed many more  
312 childhood onset asthma loci. Similarly, the asthma risk alleles at 19 loci identified in the  
313 age of onset GWAS were all associated with younger age of onset. These findings are  
314 consistent with decreased estimates of asthma heritability with increasing age of  
315 onset<sup>41</sup>. Taken together, our study shows for the first time that genetic risk for adult  
316 onset asthma is largely a subset of the genetic risk loci for childhood onset asthma, but  
317 with overall smaller effect sizes, suggesting a larger role for environmental risk factors in  
318 adult onset asthma.

319         Despite the overlap of adult onset and childhood onset loci, distinct causal  
320 pathways contributing to each were suggested by tissue enrichments: childhood onset  
321 loci were enriched for genes with highest expression in skin whereas adult onset loci  
322 were enriched for genes with highest expression in lung and spleen; both were enriched  
323 for genes highly expressed in whole blood and small intestine. The highlighting of skin  
324 as a target tissue for childhood onset asthma supports the widely held idea that asthma  
325 in childhood is due to impaired barrier function in the skin and other epithelial surfaces.  
326 This model proposes that compromised epithelial barriers promote sensitization to food  
327 and airway allergens and to wheezing illnesses in early life<sup>31,42</sup>. In fact, childhood onset  
328 specific loci identified here have been associated with AD or food allergies, such as  
329 *FLG* on 1q21.3 with the atopic march<sup>37</sup>, *AD*<sup>27-29</sup> and food allergies<sup>24-26</sup>, *KIF3A* on 5q31.1  
330 and *AP5B1/OVOL1* on 11q13.1 with the the atopic march<sup>37</sup> and *AD*<sup>43</sup>, *SERPINB7* on

331 18q21.33 with food allergies<sup>34</sup>, and *CRNN* (cornulin) on 1q21.3 with AD concomitant  
332 with asthma and reduced expression in AD-affected skin<sup>44</sup>. Variants at those loci were  
333 all associated with earlier age of asthma onset. We further show that these loci are  
334 associated with childhood onset asthma, even after exclusion of cases with a history of  
335 allergic diseases. In contrast, the enrichment for genes highly expressed in lung and  
336 spleen at adult onset loci suggests a more lung-centered, and potentially immune  
337 mediated, etiology for asthma with onset later in life. The prominent role of the HLA  
338 region in the adult onset asthma GWAS and the fact that predicted expression of three  
339 HLA region genes was associated only with adult onset asthma only further highlights a  
340 central role for immune processes driving asthma pathogenesis in adults. The fact that  
341 both childhood onset and adult onset asthma loci were enriched for genes that are most  
342 highly expressed in whole blood cells and small intestine further indicate a shared  
343 immune etiology, as suggested from a large GWAS that included both children and  
344 adults<sup>35</sup>.

345         Combining GWAS with a transcriptome-wide association test that uses  
346 combinations of associated SNPs to predict gene expression in different tissues  
347 revealed significant complexity at the two most highly associated asthma loci. SNPs at  
348 the 17q12 locus predicted expression of 18 childhood onset asthma genes and SNPs at  
349 the HLA region predicted expression of 42 genes: three were associated with adult  
350 onset asthma and most were not HLA genes *per se*. In this regard, it is notable that the  
351 *HLA-DRB1*, *HLA-DQB1*, and *HLA-DQA1* genes, which are the most associated HLA  
352 loci with autoimmune diseases, are predicted to have reduced expression in both  
353 childhood onset and adult onset asthma. Instead, HLA genes with less clear functions



354 have increased predicted expression in asthma (Figure 5). These results strengthen the  
355 argument that multiple genes contribute to asthma risk at the HLA and 17q12 loci and  
356 probably account for the highly significant GWAS p-values observed at these loci in  
357 nearly all studies. It is also likely that these genes have both tissue specific and broad  
358 effects in epithelium, lung, and immune tissues.

359 The new loci identified in our study include the first adult onset asthma specific  
360 association at 2q22.3. The lead SNP at 2q22.3 is intergenic between *TEX41* and  
361 *ACVR2A*. The predicted expression of *ACVR2A* was not associated with asthma in our  
362 study, despite it being expressed in lung, blood, small intestine and spleen. *TEX41* was  
363 not expressed in any of the five tissues investigated. Interestingly, a GWAS also  
364 performed in UKB subjects implicated variants near *TEX41* in heavy vs. never smoking  
365 behavior<sup>45</sup>. However, even after removing adult onset cases and controls with reported  
366 ‘ever smoking’, the p-value for this SNP remained significant and the OR slightly  
367 increased (OR 1.077 [95% CI 1.05, 1.11],  $p=2.26 \times 10^{-8}$ ;  $n=12,132$  cases and 176,704  
368 controls). Variants in or near this gene, which encodes a lincRNA, have been  
369 associated with cardiovascular and immune mediated traits<sup>14</sup>, making this a potentially  
370 interesting candidate gene for adult onset asthma.

371 Our study had limitations. First, diagnoses of asthma and allergic disease in  
372 study subjects were from self reported questionnaires and medical records (ICD10  
373 codes). Thus, it is possible that diagnoses, age of onset, or both are misspecified in  
374 some subjects. On the one hand, the large sample size and our ability to replicate  
375 nearly all previously reported asthma loci (appendix Table 6) suggest that our analyses  
376 were robust to any inaccuracies in the data. On the other hand, it is possible that the

377 adult onset asthmatics included cases with poor recall of childhood onset asthma in  
378 which symptoms remitted and then relapsed later in life<sup>46</sup>. Our sensitivity analysis  
379 suggested that if even as few as 5% of the adult onset cases were misclassified we  
380 should have observed some signal of association at childhood onset loci, which we did  
381 not. Second, the gene expression data used to predict candidate target genes included  
382 heterogeneous tissues and were collected mostly from adults. As a result, our study  
383 may have missed relevant genes whose expression is developmentally regulated or  
384 environment specific. Our finding of candidate genes at only 22 of the 61 asthma loci  
385 may be due in part to the importance of both in asthma pathogenesis. Moreover, all  
386 inference based on gene expression is using imputed expression. It is possible,  
387 therefore, that some relevant genes were more difficult to impute and not included in our  
388 analysis, although a recent comparative study showed that PrediXcan is a more robust  
389 method for prediction of gene expression than other related methods<sup>47</sup>. Third, because  
390 of the ethnic composition of the UKB, this study was limited to individuals of European  
391 ancestry only. As a result, we could not evaluate the genetic risk architecture or assess  
392 the effects of age of onset specific loci in other populations. Lastly, although many of the  
393 new loci discovered in our GWASs include genes previously implicated in asthma, the  
394 new genetic associations reported here need to be replicated in other populations.

395       In the largest asthma GWAS to date, we show that genetic risk loci for adult  
396 onset asthma is largely a subset of the loci associated with childhood onset asthma,  
397 with overall smaller effect sizes for onset at later ages. These data suggest that  
398 childhood onset specific loci and those associated with age of onset play a role in  
399 disease initiation, whereas the other associated loci reflect shared pathways of disease

400 progression. The differences in the target tissues that most highly express the genes at  
401 associated loci and the predicted expression of genes at age specific and shared loci  
402 provides additional genetic and molecular evidence for both shared and distinct  
403 pathogenic pathways in childhood onset and adult onset asthma. It is therefore likely  
404 that the most effective treatments will also differ between these two groups, and that  
405 strategies for precision medicine should be further personalized to account for age of  
406 asthma onset.

407

#### 408 Author's Contributions

409 All authors were involved in the conception and design of the study and in writing the  
410 manuscript. M. P. and N.S. conducted all analyses and prepared figures and tables,  
411 under the overall supervision of D.L.N., C.O., and H.K.I.

412

#### 413 URLs

414 UK Biobank, [<https://www.ukbiobank.ac.uk/>]

415 Hail: <https://github.com/hail-is/hail>

416

#### 417 Acknowledgements

418 This research has been conducted using the UK Biobank Resource under Application  
419 Number 19526.

420

421

## 422 References

- 423 1. Collaborators GBDCRD. Global, regional, and national deaths, prevalence,  
424 disability-adjusted life years, and years lived with disability for chronic obstructive  
425 pulmonary disease and asthma, 1990-2015: a systematic analysis for the Global  
426 Burden of Disease Study 2015. *Lancet Respir Med* 2017; **5**(9): 691-706.
- 427 2. Bush A, Menzies-Gow A. Phenotypic differences between pediatric and adult  
428 asthma. *Proc Am Thorac Soc* 2009; **6**(8): 712-9.
- 429 3. Busse W, Banks-Schlegel SP, Larsen GL. Childhood- versus adult-onset  
430 asthma. *Am J Respir Crit Care Med* 1995; **151**(5): 1635-9.
- 431 4. Dijk FN, de Jongste JC, Postma DS, Koppelman GH. Genetics of onset of  
432 asthma. *Curr Opin Allergy Clin Immunol* 2013; **13**(2): 193-202.
- 433 5. Holloway JW, Arshad SH, Holgate ST. Using genetics to predict the natural  
434 history of asthma? *J Allergy Clin Immunol* 2010; **126**(2): 200-9; quiz 10-1.
- 435 6. Bouzigon E, Corda E, Aschard H, et al. Effect of 17q21 variants and smoking  
436 exposure in early-onset asthma. *N Engl J Med* 2008; **359**(19): 1985-94.
- 437 7. Moffatt MF, Gut IG, Demenais F, et al. A large-scale, consortium-based  
438 genomewide association study of asthma. *N Engl J Med* 2010; **363**(13): 1211-21.
- 439 8. Bycroft C, Freeman C, Petkova D, et al. Genome-wide genetic data on ~500,000  
440 UK Biobank Participants. *bioRxiv* 2017.
- 441 9. Watanabe K, Taskesen E, van Bochoven A, Posthuma D. Functional mapping  
442 and annotation of genetic associations with FUMA. *Nature communications* 2017; **8**(1):  
443 1826.

- 444 10. Consortium TGP, Auton A, Brooks LD, et al. A global reference for human  
445 genetic variation. *Nature* 2015; **526**(7571): 68-74.
- 446 11. Gamazon ER, Wheeler HE, Shah KP, et al. A gene-based association method  
447 for mapping traits using reference transcriptome data. *Nat Genet* 2015; **47**(9): 1091-8.
- 448 12. Barbeira AN, Dickinson SP, Bonazzola R, et al. Exploring the phenotypic  
449 consequences of tissue specific gene expression variation inferred from GWAS  
450 summary statistics. *Nature communications* 2018; **9**(1): 1825.
- 451 13. Battle A, Brown CD, Engelhardt BE, Montgomery SB. Genetic effects on gene  
452 expression across human tissues. *Nature* 2017; **550**(7675): 204-13.
- 453 14. MacArthur DG, Balasubramanian S, Frankish A, et al. A systematic survey of  
454 loss-of-function variants in human protein-coding genes. *Science* 2012; **335**(6070): 823-  
455 8.
- 456 15. Zhu Z, Lee PH, Chaffin MD, et al. A genome-wide cross-trait analysis from UK  
457 Biobank highlights the shared genetic architecture of asthma and allergic diseases. *Nat*  
458 *Genet* 2018.
- 459 16. Lazarus R, Raby BA, Lange C, et al. TOLL-like receptor 10 genetic variation is  
460 associated with asthma in two independent samples. *Am J Respir Crit Care Med* 2004;  
461 **170**(6): 594-600.
- 462 17. Tantisira K, Klimecki WT, Lazarus R, et al. Toll-like receptor 6 gene (TLR6):  
463 single-nucleotide polymorphism frequencies and preliminary association with the  
464 diagnosis of asthma. *Genes Immun* 2004; **5**(5): 343-6.

- 465 18. Lau MY, Dharmage SC, Burgess JA, et al. The interaction between farming/rural  
466 environment and TLR2, TLR4, TLR6 and CD14 genetic polymorphisms in relation to  
467 early- and late-onset asthma. *Sci Rep* 2017; **7**: 43681.
- 468 19. Standl M, Sausenthaler S, Lattka E, et al. FADS gene cluster modulates the  
469 effect of breastfeeding on asthma. Results from the GINIplus and LISAplus studies.  
470 *Allergy* 2012; **67**(1): 83-90.
- 471 20. Rousseau K, Byrne C, Griesinger G, et al. Allelic association and recombination  
472 hotspots in the mucin gene (MUC) complex on chromosome 11p15.5. *Ann Hum Genet*  
473 2007; **71**(Pt 5): 561-9.
- 474 21. Johnson L, Shah I, Loh AX, et al. MUC5AC and inflammatory mediators  
475 associated with respiratory outcomes in the British 1946 birth cohort. *Respirology* 2013;  
476 **18**(6): 1003-10.
- 477 22. Akahoshi M, Obara K, Hirota T, et al. Functional promoter polymorphism in the  
478 TBX21 gene associated with aspirin-induced asthma. *Human genetics* 2005; **117**(1):  
479 16-26.
- 480 23. Stein MM, Thompson EE, Schoettler N, et al. A decade of research on the  
481 17q12-21 asthma locus: Piecing together the puzzle. *J Allergy Clin Immunol* 2018;  
482 **142**(3): 749-64 e3.
- 483 24. Brown SJ, Asai Y, Cordell HJ, et al. Loss-of-function variants in the filaggrin gene  
484 are a significant risk factor for peanut allergy. *J Allergy Clin Immunol* 2011; **127**(3): 661-  
485 7.

- 486 25. Marenholz I, Kerscher T, Bauerfeind A, et al. An interaction between filaggrin  
487 mutations and early food sensitization improves the prediction of childhood asthma. *J*  
488 *Allergy Clin Immunol* 2009; **123**(4): 911-6.
- 489 26. Venkataraman D, Soto-Ramirez N, Kurukulaaratchy RJ, et al. Filaggrin loss-of-  
490 function mutations are associated with food allergy in childhood and adolescence. *J*  
491 *Allergy Clin Immunol* 2014; **134**(4): 876-82 e4.
- 492 27. Bisgaard H, Halkjaer LB, Hinge R, et al. Risk analysis of early childhood eczema.  
493 *J Allergy Clin Immunol* 2009; **123**(6): 1355-60 e5.
- 494 28. Palmer CN, Irvine AD, Terron-Kwiatkowski A, et al. Common loss-of-function  
495 variants of the epidermal barrier protein filaggrin are a major predisposing factor for  
496 atopic dermatitis. *Nat Genet* 2006; **38**(4): 441-6.
- 497 29. Weidinger S, Illig T, Baurecht H, et al. Loss-of-function variations within the  
498 filaggrin gene predispose for atopic dermatitis with allergic sensitizations. *J Allergy Clin*  
499 *Immunol* 2006; **118**(1): 214-9.
- 500 30. Ferreira MA, Vonk JM, Baurecht H, et al. Shared genetic origin of asthma, hay  
501 fever and eczema elucidates allergic disease biology. *Nat Genet* 2017; **49**(12): 1752-7.
- 502 31. Busse WW. The atopic march: Fact or folklore? *Ann Allergy Asthma Immunol*  
503 2018; **120**(2): 116-8.
- 504 32. Yang Z, Yan WX, Cai H, et al. S100A12 provokes mast cell activation: a potential  
505 amplification pathway in asthma and innate immunity. *J Allergy Clin Immunol* 2007;  
506 **119**(1): 106-14.

- 507 33. Collison A, Hatchwell L, Verrills N, et al. The E3 ubiquitin ligase midline 1  
508 promotes allergen and rhinovirus-induced asthma by inhibiting protein phosphatase 2A  
509 activity. *Nat Med* 2013; **19**(2): 232-7.
- 510 34. Marenholz I, Grosche S, Kalb B, et al. Genome-wide association study identifies  
511 the SERPINB gene cluster as a susceptibility locus for food allergy. *Nature*  
512 *communications* 2017; **8**(1): 1056.
- 513 35. Demenais F, Margaritte-Jeannin P, Barnes KC, et al. Multiancestry association  
514 study identifies new asthma risk loci that colocalize with immune-cell enhancer marks.  
515 *Nat Genet* 2018; **50**(1): 42-53.
- 516 36. Li X, Howard TD, Zheng SL, et al. Genome-wide association study of asthma  
517 identifies RAD50-IL13 and HLA-DR/DQ regions. *J Allergy Clin Immunol* 2010; **125**(2):  
518 328-35 e11.
- 519 37. Marenholz I, Esparza-Gordillo J, Ruschendorf F, et al. Meta-analysis identifies  
520 seven susceptibility loci involved in the atopic march. *Nature communications* 2015; **6**:  
521 8804.
- 522 38. Kovacic MB, Myers JM, Wang N, et al. Identification of KIF3A as a novel  
523 candidate gene for childhood asthma using RNA expression and population allelic  
524 frequencies differences. *PloS one* 2011; **6**(8): e23714.
- 525 39. Lasky-Su J, Himes BE, Raby BA, et al. HLA-DQ strikes again: genome-wide  
526 association study further confirms HLA-DQ in the diagnosis of asthma among adults.  
527 *Clin Exp Allergy* 2012; **42**(12): 1724-33.



- 528 40. Pickrell JK, Berisa T, Liu JZ, Segurel L, Tung JY, Hinds DA. Detection and  
529 interpretation of shared genetic influences on 42 human traits. *Nat Genet* 2016; **48**(7):  
530 709-17.
- 531 41. Thomsen SF, Duffy DL, Kyvik KO, Backer V. Genetic influence on the age at  
532 onset of asthma: a twin study. *J Allergy Clin Immunol* 2010; **126**(3): 626-30.
- 533 42. Han H, Roan F, Ziegler SF. The atopic march: current insights into skin barrier  
534 dysfunction and epithelial cell-derived cytokines. *Immunol Rev* 2017; **278**(1): 116-30.
- 535 43. Johansson E, Biagini Myers JM, Martin LJ, et al. KIF3A genetic variation is  
536 associated with pediatric asthma in the presence of eczema independent of allergic  
537 rhinitis. *J Allergy Clin Immunol* 2017; **140**(2): 595-8 e5.
- 538 44. Trzeciak M, Sakowicz-Burkiewicz M, Wesserling M, et al. Altered Expression of  
539 Genes Encoding Cornulin and Repetin in Atopic Dermatitis. *Int Arch Allergy Immunol*  
540 2017; **172**(1): 11-9.
- 541 45. Wain LV, Shrine N, Miller S, et al. Novel insights into the genetics of smoking  
542 behaviour, lung function, and chronic obstructive pulmonary disease (UK BiLEVE): a  
543 genetic association study in UK Biobank. *Lancet Respir Med* 2015; **3**(10): 769-81.
- 544 46. Sears MR, Greene JM, Willan AR, et al. A longitudinal, population-based, cohort  
545 study of childhood asthma followed to adulthood. *N Engl J Med* 2003; **349**(15): 1414-22.
- 546 47. Fryett JJ, Inshaw J, Morris AP, Cordell HJ. Comparison of methods for  
547 transcriptome imputation through application to two common complex diseases. *Eur J*  
548 *Hum Genet* 2018.
- 549

550 Table 1. Characteristics of the asthma cases and controls. NA, not applicable.

|                                                           | <b>Childhood Onset (N=9,433)</b> | <b>Adolescent or Young Adult Onset (N=6,849)</b> | <b>Adulthood Onset (N=21,564)</b> | <b>Controls (N=318,237)</b> |
|-----------------------------------------------------------|----------------------------------|--------------------------------------------------|-----------------------------------|-----------------------------|
| <b>Age at recruitment (yr)</b>                            |                                  |                                                  |                                   |                             |
| Mean ( $\pm$ SD)                                          | 55 $\pm$ 8                       | 52 $\pm$ 8                                       | 57 $\pm$ 8                        | 57 $\pm$ 8                  |
| Range                                                     | 40 - 70                          | 40 - 70                                          | 40 - 70                           | 39 - 73                     |
| <b>Age at asthma onset (yr)<sup>a</sup></b>               |                                  |                                                  |                                   |                             |
| Mean ( $\pm$ SD)                                          | 6 $\pm$ 3                        | 19 $\pm$ 4                                       | 44 $\pm$ 10                       | NA                          |
| Range                                                     | 0 - 11                           | 12 - 25                                          | 26 - 65                           | NA                          |
| <b>Sex (% female)</b>                                     | 40.7                             | 57.4                                             | 63.6                              | 53.5                        |
| <b>Asthma medication use in the past 12 months, N (%)</b> | 1,383 (14.7)                     | 1,124 (16.4)                                     | 4,081 (18.9)                      | NA                          |
| <b>Current smokers N (%)</b>                              | 802 (8.5)                        | 688 (10.0)                                       | 1,379 (6.4)                       | 30,056 (9.4)                |
| <b>Allergic diseases ever</b>                             |                                  |                                                  |                                   |                             |
| Allergic rhinitis, N (%)                                  | 2,537 (26.9)                     | 2,042 (29.8)                                     | 4,660 (21.6)                      | 27,289 (8.6)                |
| Atopic dermatitis, N (%)                                  | 1,126 (11.9)                     | 473 (6.9)                                        | 927 (4.3)                         | 7,168 (2.3)                 |
| Food allergy, N (%)                                       | 138 (1.5)                        | 63 (0.9)                                         | 172 (0.8)                         | 1,229 (0.4)                 |
| Any allergic disease, N (%)                               | 3,205 (34.0)                     | 2,321 (33.9)                                     | 5,306 (24.6)                      | 33,808 (10.6)               |

551

**Table 2. Regions with SNPs that were genome-wide significant in the childhood onset or adult onset GWAS.** Information for the SNP with smallest p-value at each locus is shown.

| Locus <sup>a</sup>                      | rsID        | Position <sup>b</sup> | Nearby Genes <sup>c</sup>            | Allele <sup>d</sup> | RAF <sup>e</sup> | Childhood Onset Asthma GWAS |             |           | Adult Onset Asthma GWAS |             |          | Age of Onset GWAS |       |          |
|-----------------------------------------|-------------|-----------------------|--------------------------------------|---------------------|------------------|-----------------------------|-------------|-----------|-------------------------|-------------|----------|-------------------|-------|----------|
|                                         |             |                       |                                      |                     |                  | OR                          | 95% CI      | p-value   | OR                      | 95% CI      | p-value  | Beta              | SE    | p-value  |
| <b>A. Childhood Onset Specific Loci</b> |             |                       |                                      |                     |                  |                             |             |           |                         |             |          |                   |       |          |
| 1q21.3                                  | rs61816761  | 1:152285861           | <i>FLG, HRNR, FLG2</i>               | G/A                 | 0.024            | 1.970                       | 1.823-2.129 | 1.88E-65  | 1.016                   | 0.948-1.088 | 6.56E-01 | -4.571            | 0.426 | 8.15E-27 |
| 1q25.1                                  | rs7518129   | 1:173163568           | <i>TNFSF4, TNFSF18, PRDX6</i>        | A/G                 | 0.310            | 1.111                       | 1.077-1.146 | 2.21E-11  | 0.997                   | 0.977-1.019 | 8.17E-01 | -0.849            | 0.145 | 4.89E-09 |
| 2q36.3 <sup>f</sup>                     | rs10175070  | 2:228670575           | <i>CCL20, SLC18A3</i>                | A/G                 | 0.251            | 1.122                       | 1.086-1.160 | 4.31E-12  | 1.000                   | 0.978-1.023 | 9.92E-01 | -0.862            | 0.154 | 2.24E-08 |
| 3q28                                    | rs12634152  | 3:188121019           | <i>LPP, FLJ42393, LPP-AS1</i>        | C/T                 | 0.547            | 1.133                       | 1.100-1.166 | 1.08E-16  | 1.007                   | 0.987-1.027 | 4.98E-01 | -0.968            | 0.136 | 1.21E-12 |
| 4p14                                    | rs5743618   | 4:38798648            | <i>TLR1, TLR10, TLR6</i>             | A/C                 | 0.774            | 1.249                       | 1.203-1.295 | 3.19E-32  | 1.008                   | 0.985-1.032 | 5.09E-01 | -1.578            | 0.163 | 4.53E-22 |
| 5q13.2 <sup>f</sup>                     | rs10036789  | 5:71695918            | <i>PTCD2, ZNF366</i>                 | C/G                 | 0.460            | 1.085                       | 1.054-1.117 | 4.51E-08  | 1.016                   | 0.996-1.036 | 1.12E-01 | -0.511            | 0.137 | 1.95E-04 |
| 5q31.1 <sup>f</sup>                     | rs2051809   | 5:132056874           | <i>KIF3A, IL4, CCN2</i>              | C/A                 | 0.247            | 1.175                       | 1.137-1.214 | 3.24E-22  | 1.016                   | 0.994-1.040 | 1.58E-01 | -0.933            | 0.155 | 1.59E-09 |
| 6p25.3 <sup>f</sup>                     | rs9391997   | 6:409119              | <i>IRF4, DUSP22, EXOC2</i>           | A/G                 | 0.527            | 1.102                       | 1.070-1.135 | 6.89E-11  | 0.995                   | 0.976-1.015 | 6.35E-01 | -0.597            | 0.136 | 1.06E-05 |
| 7p15.3 <sup>f</sup>                     | rs34880821  | 7:2277545             | <i>IL6, TOMM7</i>                    | G/A                 | 0.283            | 1.106                       | 1.071-1.141 | 4.73E-10  | 1.000                   | 0.979-1.022 | 9.88E-01 | -0.667            | 0.149 | 7.59E-06 |
| 8q24.21 <sup>f</sup>                    | rs13277355  | 8:128777719           | <i>MYC, TMEM75</i>                   | G/A                 | 0.274            | 1.110                       | 1.075-1.146 | 1.65E-10  | 1.013                   | 0.991-1.036 | 2.46E-01 | -0.660            | 0.151 | 1.20E-05 |
| 9q34.3 <sup>f</sup>                     | rs117137535 | 9:140500443           | <i>ARRDC1, ZMYND19, EHMT1</i>        | G/A                 | 0.026            | 1.307                       | 1.195-1.429 | 4.16E-09  | 0.977                   | 0.913-1.046 | 5.10E-01 | -2.464            | 0.446 | 3.42E-08 |
| 10p15.1 <sup>f</sup>                    | rs943451    | 10:6621773            | <i>PRKCQ, PFKFB3, SFMBT2</i>         | C/T                 | 0.318            | 1.125                       | 1.091-1.161 | 7.51E-14  | 1.021                   | 1.000-1.043 | 5.30E-02 | -0.613            | 0.145 | 2.54E-05 |
| 11q13.1 <sup>f</sup>                    | rs479844    | 11:65551957           | <i>AP5B1, OVOL1</i>                  | A/G                 | 0.555            | 1.106                       | 1.074-1.139 | 1.48E-11  | 1.015                   | 0.995-1.035 | 1.41E-01 | -0.657            | 0.135 | 1.22E-06 |
| 11q23.3 <sup>f</sup>                    | rs12365699  | 11:118743286          | <i>CXCR5, DDX6</i>                   | A/G                 | 0.833            | 1.167                       | 1.120-1.216 | 1.57E-13  | 1.004                   | 0.978-1.031 | 7.43E-01 | -1.396            | 0.185 | 4.42E-14 |
| 12q13.2 <sup>f</sup>                    | rs62623446  | 12:55368291           | <i>TESPA1, MUC1L, NEUROD4</i>        | C/T                 | 0.072            | 1.188                       | 1.127-1.252 | 1.40E-10  | 1.038                   | 0.999-1.077 | 5.32E-02 | -1.079            | 0.253 | 1.95E-05 |
| 12q24.12 <sup>f</sup>                   | rs10774625  | 12:111910219          | <i>ATXN2, SH2B3, BRAP</i>            | A/G                 | 0.504            | 1.087                       | 1.056-1.119 | 2.07E-08  | 0.997                   | 0.978-1.017 | 7.92E-01 | -0.713            | 0.135 | 1.43E-07 |
| 12q24.31 <sup>f</sup>                   | rs1696361   | 12:121363823          | <i>SPLL3, HNF1A</i>                  | C/T                 | 0.359            | 1.109                       | 1.076-1.142 | 1.19E-11  | 1.019                   | 0.998-1.040 | 6.96E-02 | -0.696            | 0.140 | 6.84E-07 |
| 17q12                                   | rs4795399   | 17:38061439           | <i>GSDMB, ZPBP2, ORMDL3</i>          | C/T                 | 0.529            | 1.406                       | 1.365-1.448 | 1.45E-111 | 1.005                   | 0.985-1.025 | 6.28E-01 | -2.286            | 0.134 | 6.76E-65 |
| 17q21.2 <sup>f</sup>                    | rs8066625   | 17:40390629           | <i>STAT5B, GHDC, STAT5A</i>          | G/A                 | 0.100            | 1.151                       | 1.098-1.206 | 4.90E-09  | 1.006                   | 0.973-1.040 | 7.33E-01 | -0.846            | 0.227 | 1.88E-04 |
| 17q21.32 <sup>f</sup>                   | rs56308324  | 17:45819206           | <i>TBX21, TBKBP1, OSBPL7</i>         | A/T                 | 0.132            | 1.132                       | 1.086-1.180 | 3.47E-09  | 1.025                   | 0.996-1.055 | 8.72E-02 | -0.714            | 0.195 | 2.54E-04 |
| 18q21.33 <sup>f</sup>                   | rs4574025   | 18:60009814           | <i>TNFRSF11A, KIAA1468, ZCCHC2</i>   | C/T                 | 0.535            | 1.090                       | 1.058-1.122 | 9.25E-09  | 0.986                   | 0.967-1.006 | 1.69E-01 | -0.871            | 0.136 | 1.61E-10 |
| 18q21.33 <sup>f</sup>                   | rs12964116  | 18:61442619           | <i>SERPINB7, SERPINB11, SERPINB2</i> | A/G                 | 0.036            | 1.336                       | 1.247-1.432 | 2.56E-16  | 1.005                   | 0.953-1.059 | 8.62E-01 | -1.916            | 0.351 | 4.87E-08 |
| 19p13.3 <sup>f</sup>                    | rs4807630   | 19:1170445            | <i>SBNO2, GPX4, STK11</i>            | C/T                 | 0.308            | 1.093                       | 1.060-1.128 | 2.06E-08  | 1.013                   | 0.992-1.035 | 2.32E-01 | -0.487            | 0.147 | 9.25E-04 |
| <b>B. Adult Onset Specific Loci</b>     |             |                       |                                      |                     |                  |                             |             |           |                         |             |          |                   |       |          |
| 2q22.3 <sup>f</sup>                     | rs12617922  | 2:146156679           | <i>TEX41, ACVR2A</i>                 | A/G                 | 0.518            | 0.983                       | 0.955-1.012 | 2.36E-01  | 1.066                   | 1.045-1.087 | 1.59E-10 | 0.478             | 0.136 | 4.46E-04 |
| <b>C. Shared Asthma Loci</b>            |             |                       |                                      |                     |                  |                             |             |           |                         |             |          |                   |       |          |
| 1q32.1                                  | rs12023876  | 1:203093201           | <i>ADORA1, PPF1A4</i>                | T/G                 | 0.668            | 1.102                       | 1.068-1.137 | 1.11E-09  | 1.032                   | 1.010-1.053 | 3.37E-03 | -0.567            | 0.144 | 8.65E-05 |
| 2p25.1                                  | rs13416555  | 2:8441735             | <i>RNF144A, ID2</i>                  | G/C                 | 0.705            | 1.130                       | 1.094-1.167 | 1.94E-13  | 1.040                   | 1.018-1.063 | 3.50E-04 | -0.715            | 0.150 | 1.91E-06 |
| 2q12.1                                  | rs72823641  | 2:102936159           | <i>IL1RL1, IL1RL2, IL18R1</i>        | A/T                 | 0.863            | 1.415                       | 1.349-1.484 | 3.01E-46  | 1.109                   | 1.077-1.142 | 3.72E-12 | -1.687            | 0.208 | 4.73E-16 |
| 2q37.3                                  | rs34290285  | 2:242698640           | <i>D2HGDH, INGS, GAL3ST2</i>         | A/G                 | 0.745            | 1.177                       | 1.137-1.219 | 2.06E-20  | 1.081                   | 1.056-1.106 | 2.16E-11 | -0.821            | 0.159 | 2.56E-07 |
| 3p22.3 <sup>f</sup>                     | rs35570272  | 3:33047662            | <i>GLB1, TRIM71, TMPPE</i>           | G/T                 | 0.396            | 1.100                       | 1.068-1.133 | 2.68E-10  | 1.046                   | 1.025-1.067 | 9.84E-06 | -0.454            | 0.138 | 1.03E-03 |
| 4q27                                    | rs2069763   | 4:123377482           | <i>IL2, ADAD1, IL21</i>              | C/A                 | 0.334            | 1.126                       | 1.092-1.160 | 1.59E-14  | 1.032                   | 1.011-1.054 | 2.44E-03 | -0.631            | 0.142 | 8.39E-06 |
| 5p15.2 <sup>f</sup>                     | rs16903574  | 5:14610309            | <i>FAM105A, TRIO, OTULIN</i>         | C/G                 | 0.077            | 1.236                       | 1.174-1.302 | 9.01E-16  | 1.052                   | 1.013-1.091 | 7.75E-03 | -1.055            | 0.250 | 2.51E-05 |
| 5q22.1                                  | rs1837253   | 5:110401872           | <i>SLC25A46, TSLP</i>                | T/C                 | 0.740            | 1.211                       | 1.169-1.253 | 2.33E-27  | 1.088                   | 1.064-1.113 | 2.77E-13 | -0.733            | 0.158 | 3.72E-06 |
| 5q31.1                                  | rs17622378  | 5:131778452           | <i>C5orf56, SLC22A5, IRF1</i>        | G/A                 | 0.573            | 1.103                       | 1.071-1.136 | 8.52E-11  | 1.077                   | 1.055-1.098 | 3.17E-13 | -0.044            | 0.137 | 7.46E-01 |
| 6p22.1 <sup>f</sup>                     | rs1117490   | 6:30170510            | <i>TRIM26, TRIM15, TRIM39</i>        | T/C                 | 0.234            | 1.100                       | 1.063-1.137 | 2.78E-08  | 1.059                   | 1.036-1.084 | 6.83E-07 | -0.453            | 0.158 | 4.07E-03 |
| 6p21.33                                 | rs2428494   | 6:31322197            | <i>HLA-B, HLA-C, MICA</i>            | T/A                 | 0.477            | 1.157                       | 1.124-1.191 | 7.94E-23  | 1.104                   | 1.082-1.126 | 4.77E-23 | -0.648            | 0.136 | 1.78E-06 |
| 6p21.32                                 | rs28407950  | 6:32626348            | <i>HLA-DQA1, HLA-DQB</i>             | T/C                 | 0.756            | 1.354                       | 1.306-1.405 | 1.27E-59  | 1.148                   | 1.121-1.175 | 7.67E-31 | -1.284            | 0.163 | 4.03E-15 |
| 6q15                                    | rs1321859   | 6:91011673            | <i>BACH2, MAP3K7</i>                 | T/C                 | 0.649            | 1.102                       | 1.068-1.136 | 9.32E-10  | 1.076                   | 1.054-1.098 | 5.68E-12 | -0.268            | 0.144 | 6.28E-02 |
| 7p21.1 <sup>f</sup>                     | rs4473914   | 7:20426263            | <i>ITGB6, MACC1, ABCB5</i>           | C/T                 | 0.604            | 1.092                       | 1.060-1.125 | 9.02E-09  | 1.035                   | 1.014-1.056 | 8.44E-04 | -0.338            | 0.139 | 1.51E-02 |
| 7p15.1 <sup>f</sup>                     | rs917115    | 7:28172586            | <i>JAZF1, TAX1BP1, CREB5</i>         | T/C                 | 0.208            | 1.112                       | 1.074-1.152 | 1.73E-09  | 1.042                   | 1.017-1.067 | 7.35E-04 | -0.577            | 0.164 | 4.17E-04 |
| 8q21.13                                 | rs4739738   | 8:81291645            | <i>TPD52, ZBTB10</i>                 | A/G                 | 0.359            | 1.117                       | 1.084-1.151 | 3.45E-13  | 1.057                   | 1.036-1.079 | 8.63E-08 | -0.450            | 0.140 | 1.27E-03 |
| 9p24.1                                  | rs992969    | 9:6209697             | <i>RANBP6, IL33</i>                  | G/A                 | 0.252            | 1.248                       | 1.209-1.289 | 6.76E-42  | 1.100                   | 1.076-1.125 | 3.14E-17 | -1.026            | 0.152 | 1.35E-11 |
| 10p14 <sup>f</sup>                      | rs7894791   | 10:8591369            | <i>GATA3, CELF2</i>                  | A/C                 | 0.587            | 1.103                       | 1.071-1.137 | 9.43E-11  | 1.024                   | 1.004-1.045 | 1.94E-02 | -0.494            | 0.137 | 3.24E-04 |
| 10p14                                   | rs1775554   | 10:9054340            | <i>GATA3, CELF2</i>                  | C/A                 | 0.577            | 1.117                       | 1.084-1.150 | 2.85E-13  | 1.121                   | 1.098-1.143 | 5.17E-29 | -0.002            | 0.138 | 9.91E-01 |
| 11p15.5 <sup>f</sup>                    | rs12788104  | 11:1123739            | <i>MUC6, MUC5AC</i>                  | A/G                 | 0.688            | 1.029                       | 0.997-1.061 | 7.99E-02  | 1.064                   | 1.041-1.087 | 1.41E-08 | 0.147             | 0.148 | 3.22E-01 |
| 11q12.2 <sup>f</sup>                    | rs174621    | 11:61630104           | <i>FADS2, FADS1, FADS3</i>           | A/G                 | 0.772            | 1.013                       | 0.978-1.049 | 4.63E-01  | 1.071                   | 1.046-1.097 | 1.46E-08 | 0.508             | 0.163 | 1.87E-03 |
| 11q13.5 <sup>g</sup>                    | rs61894547  | 11:76248630           | <i>EMSY, THAP12, LRRC32</i>          | C/T                 | 0.052            | 1.463                       | 1.382-1.548 | 2.17E-39  | 1.093                   | 1.047-1.141 | 5.46E-05 | -2.227            | 0.284 | 4.42E-15 |

|                      |            |             |                                 |     |       |       |             |          |       |             |          |        |       |          |
|----------------------|------------|-------------|---------------------------------|-----|-------|-------|-------------|----------|-------|-------------|----------|--------|-------|----------|
|                      | rs7936312  | 11:76293726 | <i>EMSY, LRRC32</i>             | G/T | 0.477 | 1.194 | 1.160-1.230 | 4.89E-33 | 1.060 | 1.040-1.081 | 4.10E-09 | -0.978 | 0.134 | 3.49E-13 |
| 12q13.11             | rs56389811 | 12:48205358 | <i>HDAC7, SLC48A1, VDR</i>      | T/C | 0.761 | 1.022 | 0.988-1.058 | 2.11E-01 | 1.078 | 1.054-1.104 | 2.36E-10 | 0.485  | 0.161 | 2.55E-03 |
| 12q13.2              | rs705699   | 12:56384804 | <i>RAB5B, CDK2, SUOX</i>        | G/A | 0.425 | 1.106 | 1.074-1.139 | 1.43E-11 | 1.052 | 1.031-1.072 | 6.10E-07 | -0.481 | 0.136 | 4.20E-04 |
| 12q13.3              | rs3122929  | 12:57509102 | <i>STAT6, NAB2, LRP1</i>        | C/T | 0.404 | 1.134 | 1.101-1.167 | 6.59E-17 | 1.061 | 1.040-1.082 | 5.73E-09 | -0.564 | 0.138 | 4.07E-05 |
| 12q21.1 <sup>f</sup> | rs11178648 | 12:71533210 | <i>TSPAN8, PTPRR, LGR5</i>      | T/C | 0.592 | 1.087 | 1.055-1.120 | 4.16E-08 | 1.052 | 1.031-1.073 | 6.62E-07 | -0.183 | 0.138 | 1.86E-01 |
| 13q32.3              | rs1887704  | 13:99974492 | <i>UBAC2, DOCK9, TM9SF2</i>     | C/G | 0.681 | 1.124 | 1.089-1.161 | 5.48E-13 | 1.048 | 1.026-1.070 | 1.57E-05 | -0.476 | 0.147 | 1.15E-03 |
| 14q24.1              | rs1950897  | 14:68760141 | <i>RAD51B, ZFYVE26, ZFF36L1</i> | T/C | 0.287 | 1.096 | 1.062-1.131 | 1.38E-08 | 1.031 | 1.009-1.053 | 5.39E-03 | -0.520 | 0.148 | 4.52E-04 |
| 15q22.2              | rs11071559 | 15:61069988 | <i>RORA, ANXA2, VPS13C</i>      | T/C | 0.872 | 1.205 | 1.151-1.262 | 2.57E-15 | 1.069 | 1.037-1.101 | 1.22E-05 | -0.958 | 0.210 | 5.11E-06 |
| 15q22.33             | rs56062135 | 15:67455630 | <i>SMAD3, SMAD6, AAGAB</i>      | C/T | 0.237 | 1.194 | 1.156-1.234 | 2.97E-26 | 1.083 | 1.058-1.108 | 6.27E-12 | -0.681 | 0.155 | 1.10E-05 |
| 16p13.13             | rs35032408 | 16:11215424 | <i>CLEC16A, CIITA, RMI2</i>     | G/T | 0.785 | 1.152 | 1.111-1.195 | 4.59E-14 | 1.073 | 1.048-1.100 | 1.10E-08 | -0.568 | 0.169 | 7.91E-04 |
| 16p12.1              | rs3785356  | 16:27349168 | <i>IL4R, NSMCE, IL21R</i>       | C/T | 0.297 | 1.122 | 1.087-1.157 | 5.69E-13 | 1.036 | 1.014-1.058 | 1.24E-03 | -0.641 | 0.147 | 1.30E-05 |
| 16q12.1              | rs2066844  | 16:50745926 | <i>NOD2, SNX20, CYLD</i>        | C/T | 0.048 | 1.194 | 1.121-1.272 | 3.52E-08 | 1.049 | 1.003-1.097 | 3.76E-02 | -0.743 | 0.306 | 1.54E-02 |
| 17q21.33             | rs28406364 | 17:47454507 | <i>ZNF652, PHB</i>              | C/T | 0.377 | 1.108 | 1.076-1.142 | 1.39E-11 | 1.036 | 1.015-1.057 | 6.55E-04 | -0.489 | 0.140 | 4.81E-04 |
| 19q13.11             | rs10414065 | 19:33721455 | <i>LRP3, CEBPA</i>              | T/C | 0.934 | 1.207 | 1.133-1.287 | 6.37E-09 | 1.108 | 1.064-1.155 | 1.01E-06 | -1.078 | 0.291 | 2.12E-04 |
| 21q22.12             | rs11088309 | 21:36464631 | <i>RUNX1, SETD4</i>             | C/G | 0.143 | 1.039 | 0.997-1.083 | 6.82E-02 | 1.079 | 1.050-1.109 | 4.83E-08 | 0.063  | 0.189 | 7.38E-01 |

<sup>a</sup>Cytogenetic band. <sup>b</sup>SNP position, Genome Reference Consortium Build 37 (hg19). <sup>c</sup>The gene in which the SNP is located is indicated first, followed by the previous gene and the next gene; for intergenic SNPs, only the previous and next genes are shown. <sup>d</sup>Alleles are shown as non-risk/risk alleles, where the risk allele is the allele associated with increased asthma risk. <sup>e</sup>RAF, risk allele frequency in the UK Biobank. <sup>f</sup>Not reported in previous GWAS. <sup>g</sup>The SNP with the smallest p-value differs in the childhood onset GWAS and the adult onset GWAS at the same locus; both SNPs are shown.

## Figure Legends

**Figure 1. GWAS of childhood onset and adult onset asthma.** Miami plot showing results for the childhood onset versus controls GWAS (blue, panel A) and adult onset versus controls GWAS (red, panel B). Each point corresponds to a SNP; the y-axes show the  $-\log_{10}p$ -values from the childhood onset GWAS (panel A) and adult onset GWAS (panel B). The x-axis shows the position of each SNP along the 22 autosomes.

**Figure 2.** Forest plot showing the odds ratios (ORs) and 95% confidence intervals from the childhood onset (blue) and adult onset (red) GWASs, and betas and standard errors (gray) from the age of onset GWAS for the 61 asthma associated loci. Left panel: Childhood onset specific loci (top) and adult onset specific locus (bottom); right panel: Shared loci. Loci within each group are sorted by OR in the childhood onset GWAS (largest to smallest).

**Figure 3.** Age of onset effects (ORs) for lead SNPs at three genome-wide significant childhood onset specific loci (1q21.3, 4p14 and 17q12), and three genome-wide significant shared loci (2q12.1, 6p21.32, and 11q13.5). The sample sizes for the age of onset bins are [0,5]: n=4,637; [6,10]: n=4,255; [11,15]: n=2,684; [16,20]: n=2,128; [21,25]: n=2,578; [26,30]: n=2,923; [31,35]: n=2,599; [36,40]: n=3,571; [41,45]: n=2,967; [46,50]: n=3,266, [51,55]: n=2,544; [56,65]: n=3,694.

**Figure 4. Results of PrediXcan studies at non-HLA region loci.** Genes whose predicted expression was significantly associated with asthma in either the childhood onset cases or the

adult onset cases are shown for skin (left panels), lung (middle panels) and whole blood (right panels). Values shown for skin combine both sun exposed and not sun exposed skin, showing the most significant statistic of the two. Results using gene expression in spleen and small intestine are shown in appendix Figure 5. The z-scores on the x- and y-axes are from transcriptome-wide tests of association with asthma using SNP sets that predict the expression of that gene. The diagonal dashed lines show the expected when associations are the same in the childhood onset and adult onset cases. The horizontal/vertical dashed lines correspond to z-scores  $\pm 4.84$  ( $p=1.29 \times 10^{-6}$ ); the horizontal/vertical dotted lines correspond to z-scores  $\pm 1.96$  ( $p=0.05$ ). Colored backgrounds correspond to the chromosome location of each gene (see Key). Upper panels: Genes that are associated with childhood onset asthma (no genes were associated with adult onset asthma). Lower panels: Shared genes associated with both childhood onset and adult onset asthma. HLA region genes (6p21.32 and 6p21.33) are shown in Figure 5.

**Figure 5. Results of PrediXcan studies of HLA region genes.** Genes in the HLA region whose predicted expression was associated with childhood onset or adult onset asthma are shown for skin (left panel), lung tissue (middle panel) and whole blood (right panel). Results using gene expression in spleen and small intestine are shown in appendix Figure 6. The genes on darker shaded backgrounds correspond to shared genes; the four genes on lighter color backgrounds are age-specific. See Figure 4 for additional details.

**Figure 1**

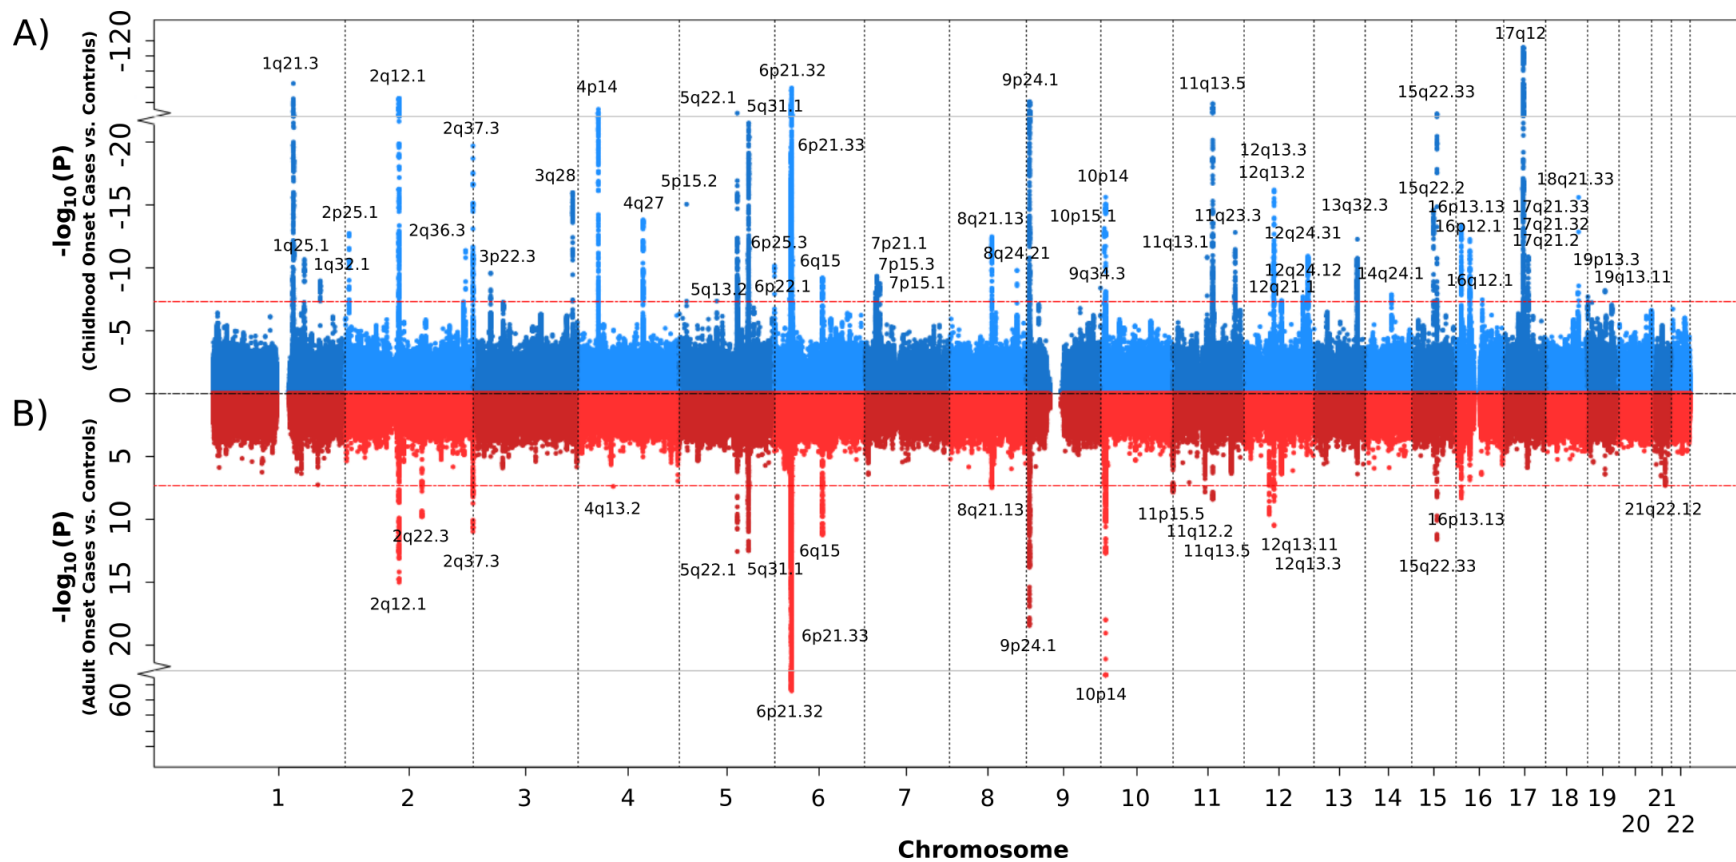

Figure 2

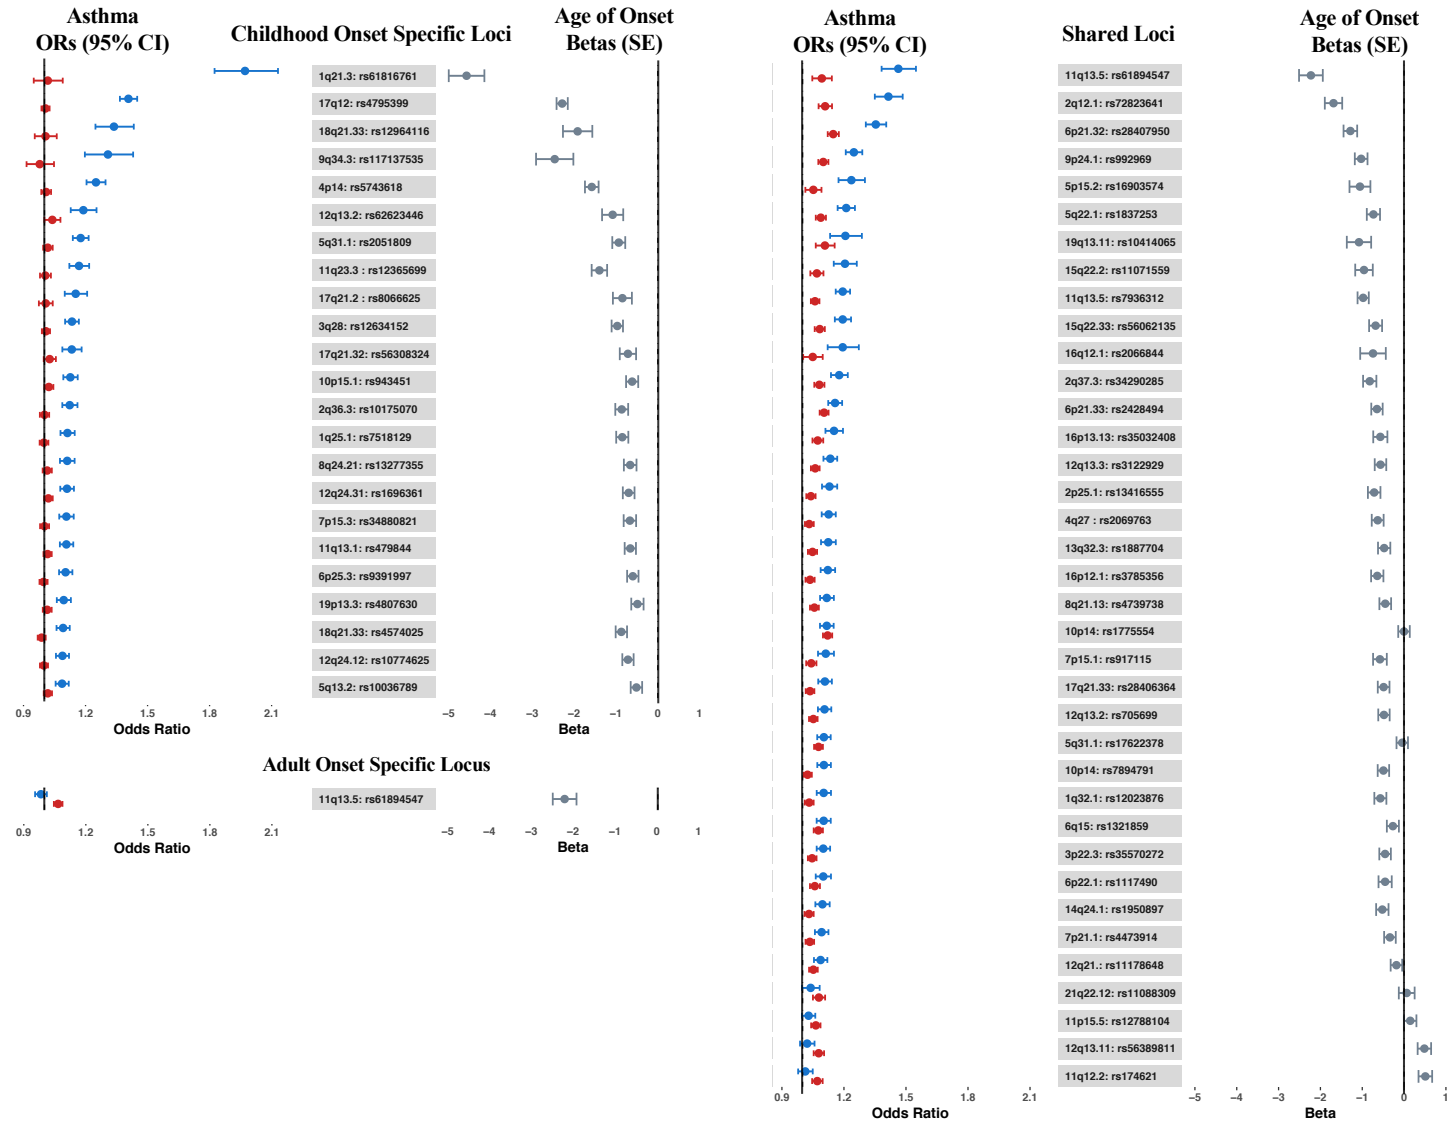



**Figure 3**

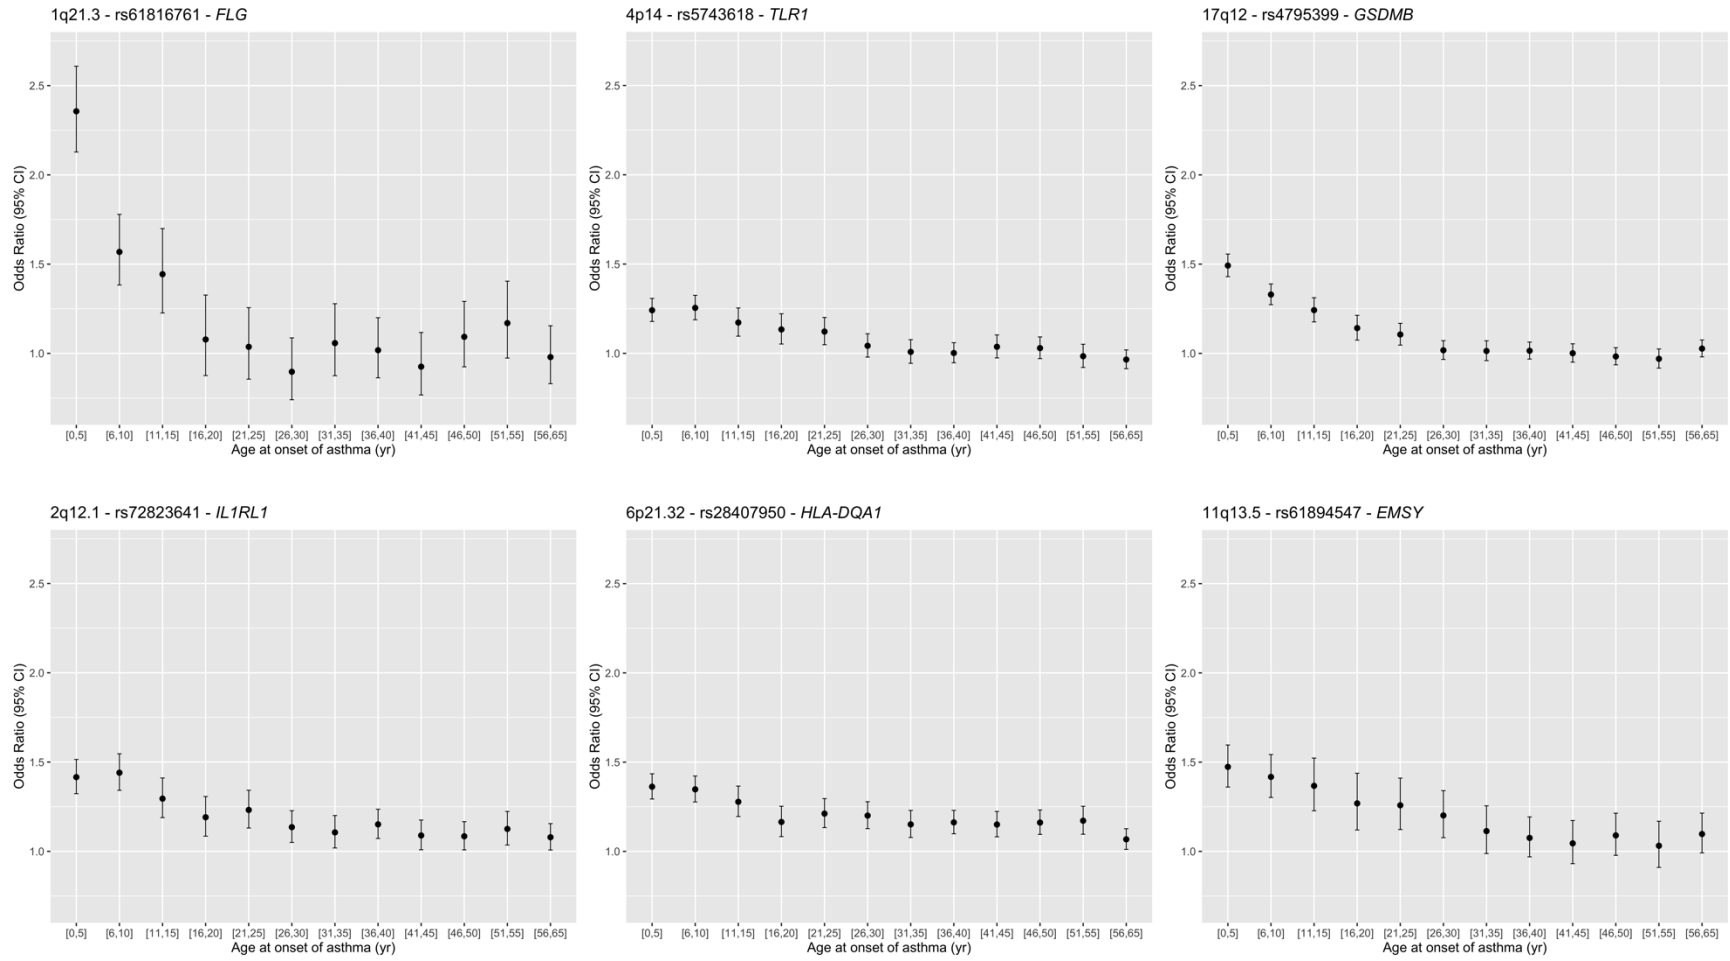

Figure 4

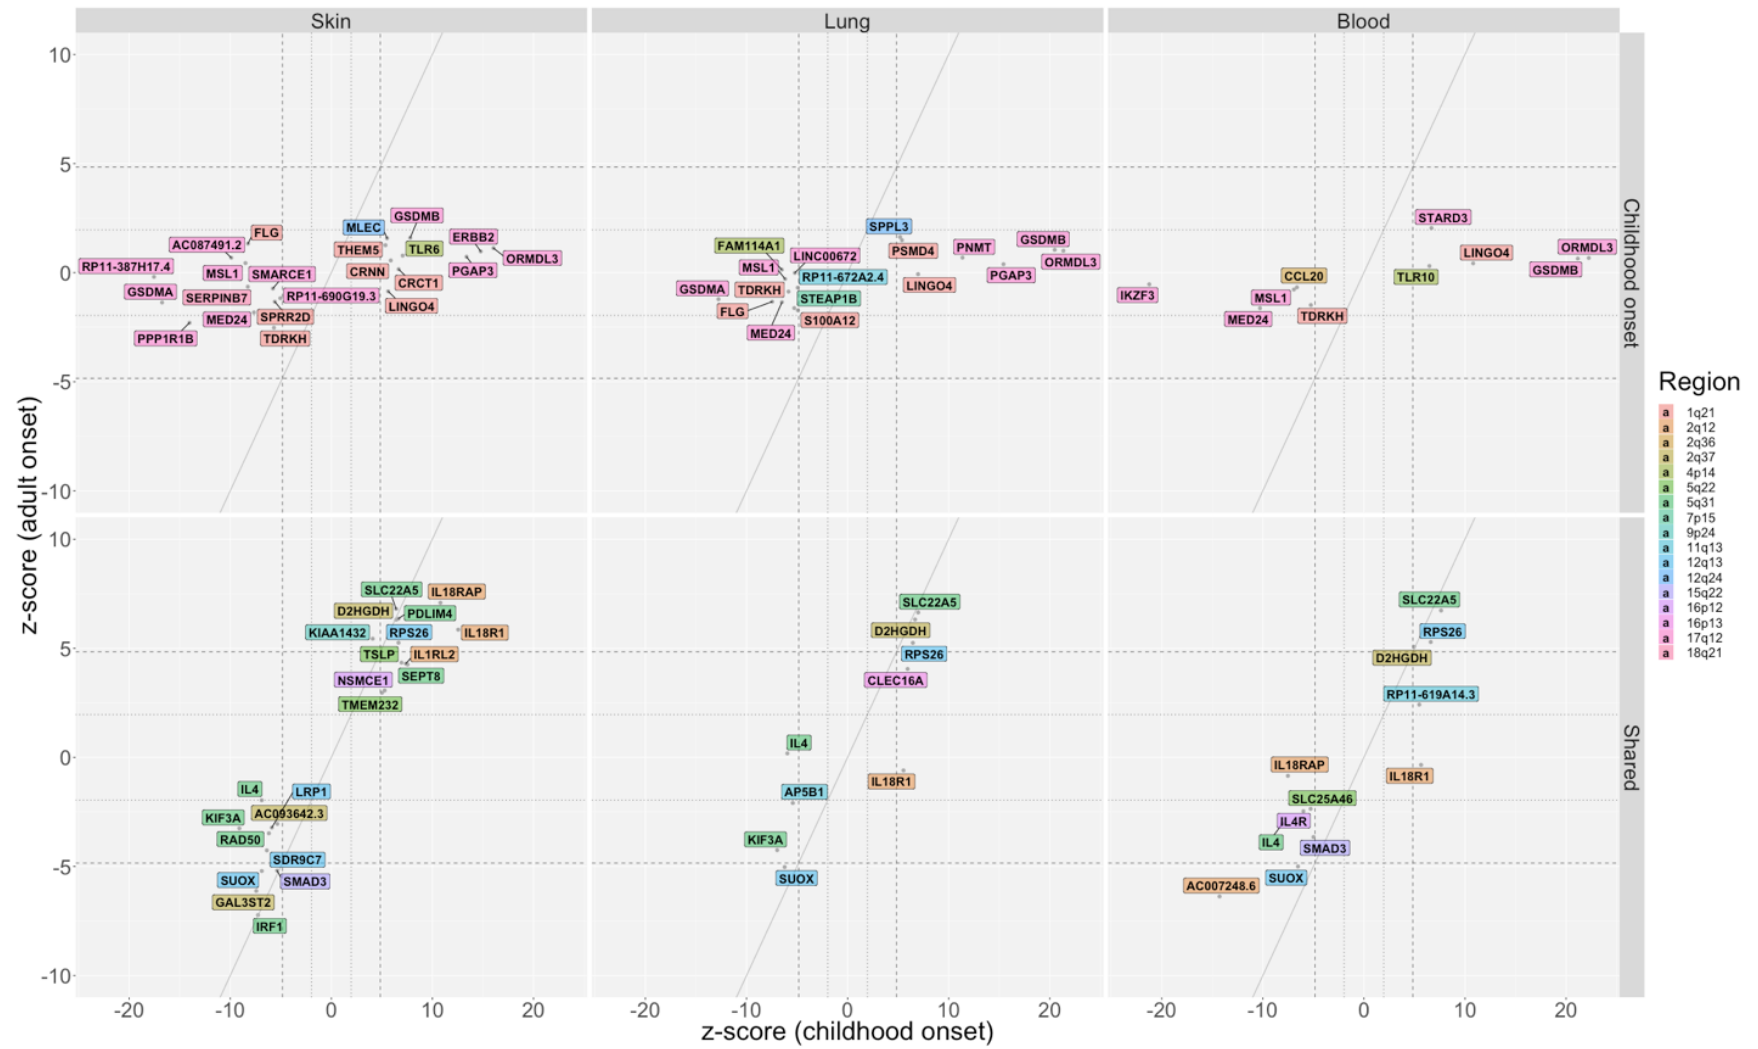

Figure 5

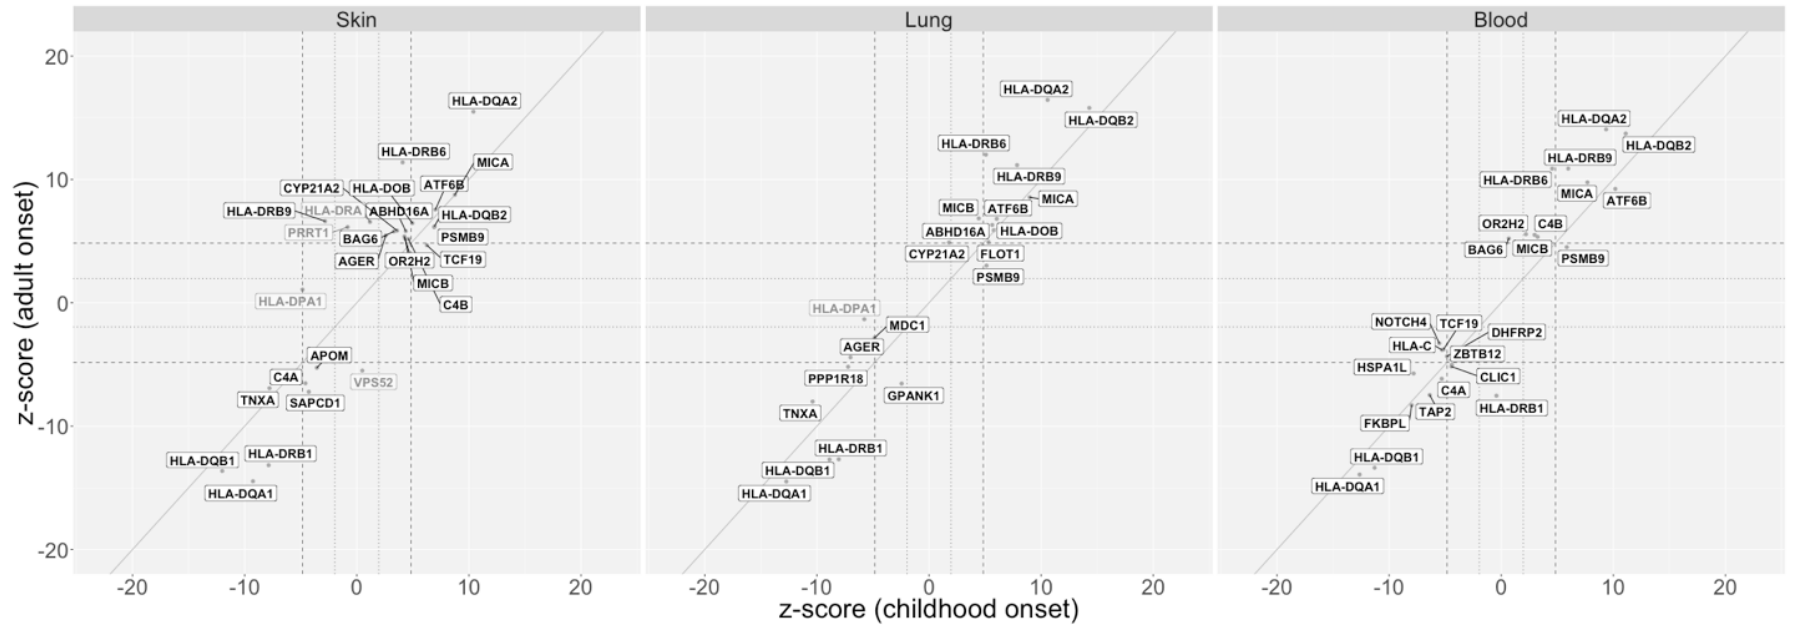

Source: https://www.biorxiv.org/content/10.1101/427427v1.full.pdf
