1 Shared and Distinct Genetic Risk Factors for Childhood Onset and Adult  
2 Onset Asthma: Genome- and Transcriptome-wide Studies

3

4 Milton Pividori, PhD<sup>1,^</sup>, Nathan Schoettler, MD, PhD<sup>1,2,^</sup>, Dan L. Nicolae, PhD<sup>1,2,3,#</sup>,  
5 Carole Ober, PhD<sup>2,#</sup>, Hae Kyung Im, PhD<sup>1,2,§</sup>

6

7 Departments of Medicine<sup>1</sup>, Human Genetics<sup>2</sup> and Statistics<sup>3</sup>, The University of Chicago,  
8 Chicago, IL

9

10 <sup>^</sup>These authors contributed equally.

11 <sup>#</sup>Full Professors

12 <sup>§</sup>Corresponding Author:

13 HKI [haky@uchicago.edu](mailto:haky@uchicago.edu)

14

15

16

## 17 **Background**

18 Childhood and adult onset asthma differ with respect to severity and co-morbidities.  
19 Whether they also differ with respect to genetic risk factors has not been previously  
20 investigated in large samples. The goals of this study were to identify shared and  
21 distinct genetic risk loci for childhood and adult onset asthma, and the genes that may  
22 mediate the effects of associated variation.

## 23 **Methods**

24 We used data from UK Biobank to conduct genome-wide association studies (GWASs)  
25 in 37,846 subjects with asthma, including 9,433 childhood onset cases (onset before  
26 age 12) and 21,564 adult onset cases (onset between ages 26 and 65), and 318,237  
27 subjects without asthma (controls; older than age 38). We conducted GWASs for  
28 childhood onset asthma and adult onset asthma each compared to shared controls, and  
29 for age of asthma onset in all 37,846 asthma cases. Enrichment studies determined the  
30 tissues in which genes at GWAS loci were most highly expressed, and PrediXcan, a  
31 transcriptome-wide gene-based test, was used to identify candidate risk genes.

## 32 **Findings**

33 We detected 61 independent asthma loci: 23 were childhood onset specific, one was  
34 adult onset specific, and 37 were shared. Nineteen loci were associated with age of  
35 asthma onset. Genes at the childhood onset loci were most highly expressed in skin,  
36 blood and small intestine; genes at the adult onset loci were most highly expressed in  
37 lung, blood, small intestine and spleen. PrediXcan identified 113 unique candidate  
38 genes at 22 of the 61 GWAS loci.

## 39 **Interpretation**

40 Genetic risk factors for adult onset asthma are largely a subset of the genetic risk for  
41 childhood onset asthma but with overall smaller effects, suggesting a greater role for  
42 non-genetic risk factors in adult onset asthma. In contrast, the onset of disease in  
43 childhood is associated with additional genes with relatively large effect sizes, and SNP-  
44 based heritability estimates that are over 3-times larger than for adult onset disease.  
45 Combined with gene expression and tissue enrichment patterns, we suggest that the  
46 establishment of disease in children is driven more by dysregulated allergy and  
47 epithelial barrier function genes whereas the etiology of adult onset asthma is more  
48 lung-centered and environmentally determined, but with immune mediated mechanisms  
49 driving disease progression in both children and adults.

50

#### 51 **Funding**

52 This work was supported by the National Institutes of Health grants R01 MH107666 and  
53 P30 DK20595 to HKI, R01 HL129735, R01 HL122712, P01 HL070831, and UG3  
54 OD023282 to CO; NS was supported by T32 HL007605.

55

56

57 Key Words: asthma GWAS, adult onset asthma, childhood onset asthma,  
58 transcriptome, UK Biobank

## 59 **Research in Context**

### 60 Evidence before this study

61 Genome-wide association studies in large samples that include both childhood onset  
62 and adult onset asthma have identified many loci associated with asthma risk. However,  
63 little was known about the shared or distinct effects of those or other loci on age of  
64 asthma onset, or about the genes that may mediate the effects of loci associated with  
65 childhood and/or adult onset asthma.

### 66 Added value of this study

67 Leveraging the resources of UK Biobank, we identified loci with both age of onset  
68 specific effects and shared effects. We further showed a significantly greater  
69 contribution of genetic variation to childhood onset asthma, implying a greater role for  
70 environmental risk factors in adult onset asthma, and different biological pathways and  
71 tissue enrichments for genes at loci associated with childhood vs adult onset asthma.

### 72 Implications of all the available evidence

73 Our results suggest that childhood onset specific loci and those associated with age of  
74 onset play a role in disease initiation, whereas the other associated loci reflect shared  
75 mechanisms of disease progression. The childhood onset specific loci highlight skin as  
76 a primary target tissue for early onset disease and support the idea that asthma in  
77 childhood is due to impaired barrier function in the skin and other epithelial surfaces.

## 78 **Introduction**

79 Asthma is the most prevalent chronic respiratory disease worldwide<sup>1</sup>. Its diagnosis is  
80 based on the presence of reversible airflow obstruction and clinical symptoms that  
81 include wheeze, cough, and shortness of breath. Despite these shared features, asthma  
82 is likely many different conditions. In particular, childhood onset asthma and adult onset  
83 asthma differ with respect to sex ratios, triggers of exacerbation, associated co-  
84 morbidities, severity<sup>2,3</sup>, and potentially also for genetic risk factors<sup>4,5</sup>. For example, the  
85 most often replicated and most statistically significant genome-wide association study  
86 (GWAS) single nucleotide polymorphisms (SNPs) at the 17q12-21 locus are specific to  
87 asthma with onset of symptoms in early life<sup>6</sup>. Only one asthma GWAS to date was  
88 performed in adult onset cases. The GABRIEL Consortium included 1,947 cases with  
89 adult onset asthma (defined as 16 years of age or older) and 3,669 adult controls<sup>7</sup>.  
90 Overall, genome-wide significant variants in the combined sample of 10,365 cases and  
91 16,110 controls revealed larger odds ratios (ORs) in the childhood onset group  
92 compared to the adult onset group, but no loci reached significance in the adult onset  
93 cases, likely due to low power. It remains unknown, therefore, whether loci other than  
94 17q12-21 contribute specifically to childhood onset or adult onset asthma. Delineating  
95 genetic risk factors affecting age of onset from those that are shared between childhood  
96 and adult onset asthma could provide insights into the molecular mechanisms  
97 contributing to different clinical manifestations of asthma that is diagnosed at different  
98 ages.

99 To address this question and directly compare genetic risk architectures of adult  
100 onset and childhood onset asthma, we leveraged UK Biobank (UKB), a large-scale

101 prospective study collecting demographic, clinical, medical history, and genetic data for  
102 nearly 500,000 participants<sup>8</sup>. We performed three asthma GWASs, one in 9,433 adults  
103 with a diagnosis of asthma before age 12 years (childhood onset cases) and one in  
104 21,564 adults with a diagnosis of asthma between age 26 and 65 years (adult onset  
105 cases), each compared to 318,237 adults (>38 years) who did not have a diagnosis of  
106 asthma or chronic obstructive lung disease (COPD) (controls). In our study sample, the  
107 proportion of self-reported doctor diagnosed asthma was 37,846/318,237 (11.9%),  
108 lower than the UK lifetime prevalence of “patient reported clinician diagnosed asthma”  
109 of 15.6%<sup>9</sup> and consistent with the known healthy volunteer bias in UK Biobank<sup>10</sup>. In  
110 addition, we conducted an age of onset GWAS in 37,846 asthma cases. Our goals were  
111 to identify shared and distinct genetic risk loci for childhood and adult onset asthma, and  
112 to identify genes that may mediate the effects of associations at age of onset specific  
113 loci and those shared between childhood and adult onset asthma.

114

## 115 **Methods**

### 116 Sample composition and case definitions

117 Data for 376,358 British white individuals from UKB data release July 2017 were used<sup>8</sup>.  
118 We extracted disease status (asthma, allergic rhinitis, atopic dermatitis, food allergy,  
119 COPD, emphysema, chronic bronchitis), age of onset of asthma, and sex from self-  
120 reported questionnaires and hospital records (ICD10 codes) by querying our in-house  
121 protected UKB database server<sup>11</sup>. See our ‘reproducible research’ and other details in  
122 the appendix (pp 4-10). Among the 37,846 asthma cases included in our study, all had

123 self-reported doctor diagnosed asthma. Of those, 15,519 also had hospital records with  
124 an asthma diagnosis (ICD10 codes).

125 We defined childhood and adult onset asthma using strict age of onset criteria  
126 that would minimize the likelihood of misclassification, and considered asthma cases  
127 with onset < 12 years of age as childhood onset cases (n=9,433; 3,462/9,433 [36.7%]  
128 with ICD10 codes) and with onset > 25 and before 66 years of age as adult onset cases  
129 (n=21,564; 9,260/21,564 [42.9%] with ICD10 codes). UKB participants without an  
130 asthma diagnosis were included as controls (n=318,237). Individuals with COPD,  
131 emphysema or chronic bronchitis were excluded from adult onset cases and controls.  
132 For the age of onset GWAS, we included an additional 6,849 subjects with asthma with  
133 onset between the ages of 12 and 25 years of age (2,797/6,849 [40.8%] with ICD10  
134 codes). Characteristics of the sample are shown in Table 1. After genotype quality  
135 control, 10,894,596 variants were available for analyses. See appendix (pp 4-7) for  
136 additional details on genotype QC and phenotype definitions.

137

### 138 Genome-wide association studies

139 We conducted a childhood onset and adult onset GWAS by logistic regression and an  
140 age of onset GWAS by linear regression, both using the allele dosages under an  
141 additive genetic model, as implemented in Hail (<https://github.com/hail-is/hail>). All  
142 analyses were performed using the Bionimbus Protected Data Cloud<sup>12</sup>. In all three  
143 GWASs, we included sex and the first 10 genetic principal components as covariates  
144 and used a genome-wide significance threshold of  $5 \times 10^{-8}$ . FUMA<sup>13</sup>, an integrative post-  
145 GWAS annotation web-based tool, was used to define independent risk loci and identify

146 enriched tissues. FUMA defines independent loci using linkage disequilibrium (LD)  
147 information from the 1000 Genomes project<sup>14</sup>. We specified an  $r^2$  threshold  $>0.6$   
148 between genome-wide significant SNPs to represent a single locus. Tissue enrichments  
149 were calculated in FUMA using a hypergeometric test to determine overrepresentation  
150 of genes mapped to risk loci (by physical distance) among highly expressed genes in  
151 each tissue in GTEx relative to all others.

152 Childhood onset and adult onset specific loci were defined as those that were  
153 genome-wide significant in either the childhood onset or adult onset GWAS but were not  
154 associated with asthma at  $p < 0.05$  in the other group, and the 95% confidence intervals  
155 (CIs) of the respective ORs did not overlap. All other GWAS loci that were genome-wide  
156 significant in at least one of the two GWASs were considered to be shared.

157

#### 158 SNP-based heritability estimation

159 We used Linkage Disequilibrium Score regression (LDSC) to estimate the SNP-based  
160 heritability from the childhood onset, adult onset and age of onset GWAS summary  
161 statistics, using SNPs overlapping with HapMap3 variants, as recommended<sup>15</sup>, and  
162 estimated population prevalence of 8.68% for childhood onset asthma and 9.55% for  
163 adult onset asthma<sup>16</sup>. Heritability estimates for binary traits are reported in the liability  
164 scale.

165

#### 166 Sensitivity analysis to adult onset misclassification

167 We performed two sets of sensitivity analyses to assess 1) the effects of potential poor  
168 recall of age of onset among subjects with adult onset asthma, and 2) the effects of



169 misclassification of COPD as asthma among the adult onset cases, even with exclusion  
170 of cases with a reported diagnosis of COPD, emphysema or chronic bronchitis. First, to  
171 assure that the adult onset cases did not include a significant proportion of childhood  
172 onset asthma in which symptoms remitted in early life but then relapsed in adulthood,  
173 we replaced adult onset cases with increasing proportions of randomly selected  
174 childhood onset cases, and then tested for association at the two most significant  
175 childhood onset specific loci. This procedure was repeated 20 times for each proportion  
176 to quantify the sampling variability (appendix pp 7-8). Second, we performed two  
177 analyses in which we removed either subjects with ages of asthma onset between 46 to  
178 65 years or adult-onset cases and controls with FEV1/FVC <0.70. For each, we  
179 compared p-values and ORs to the GWAS including all adult onset cases (appendix pp  
180 8-9).

181

#### 182 Predicted transcriptome association test

183 We used the PrediXcan<sup>17</sup> framework to identify genes that may mediate associations  
184 between genetic variants and asthma risk. PrediXcan is a software tool that estimates  
185 tissue-specific gene expression profiles from an individual's SNP genotype profile using  
186 prediction models trained in large references databases of genotypes and tissue-  
187 specific gene expression profiles. Using these genotype-imputed expression profiles,  
188 PrediXcan can perform gene-based association tests that correlate predicted  
189 expression levels with phenotypes (e.g., asthma) to identify candidate causal genes  
190 from GWAS data. We used a summary version of PrediXcan, which has high  
191 concordance with the individual level version ( $R^2 > 0.99$ )<sup>18</sup>. For predictions, we

192 downloaded elastic net models trained with reference transcriptome data from the GTEx  
193 consortium<sup>19</sup> (<http://predictdb.org>) for 49 tissues (appendix Table 1).

194 PrediXcan was run separately in the childhood onset and adult onset cases,  
195 each with the same controls. Significance was determined using a Bonferroni correction  
196 for the 38,608 genes ( $p < 1.29 \times 10^{-6}$ ) that were expressed in the five tissues determined  
197 by FUMA to be enriched (skin, lung tissue, whole blood, small intestine and spleen; see  
198 Results). We defined childhood onset specific genes as those whose predicted  
199 expression is significantly associated with childhood onset asthma and the variants that  
200 predict their expression are within childhood onset specific loci. Adult onset specific  
201 genes were similarly defined. Because SNPs at shared loci may predict the expression  
202 of genes that are associated only in childhood onset or adult onset cases, we also  
203 considered genes to be age of onset specific if they were significantly associated with  
204 asthma at  $p < 1.29 \times 10^{-6}$  in one age group and not associated with asthma at  $p < 0.05$  in  
205 the other. All other genes were considered shared.

206

#### 207 Role of funding source

208 The funding source did not have any role in the study design; collection, analysis or  
209 interpretation of data; in writing the manuscript; in the decision to submit the paper for  
210 publication; or determining who has access to the raw data. The corresponding author  
211 had full access to all the data in the study and had final responsibility for the decision to  
212 submit for publication.

213

## 214 Results

### 215 Genome-wide association studies of asthma

216 We first conducted GWASs of childhood onset and adult onset asthma. These studies  
217 revealed 61 independent loci associated with asthma, 52 were significant in the  
218 childhood onset asthma GWAS and 19 were significant in the adult onset asthma  
219 GWAS ( $p < 5 \times 10^{-8}$ ) (Figure 1). The GWAS results were robust to inclusion of varying  
220 numbers of PCs (10, 14, or 20) (appendix Figure 1) and to limiting the sample to cases  
221 with diagnoses based on ICD10 codes (appendix Figure 2). Twenty-eight of the 61 loci,  
222 in 27 chromosomal regions, were not previously reported in the GWAS catalog<sup>20</sup>,  
223 including one study also conducted in UKB subjects but focused on the phenotype  
224 asthma+allergies<sup>21</sup>. Among the 28 new loci, 17 were significant in the childhood onset  
225 GWAS, one was significant in the adult onset GWAS, and 10 were significant in both  
226 (Table 2). Some of these loci contained genes that have been associated with asthma  
227 in candidate gene studies (e.g., *FADS2*<sup>22</sup>, *MUC5AC*<sup>23,24</sup> and *TBX21*<sup>25</sup>), which provide  
228 independent validation of our GWAS findings. The lead SNP or an LD surrogate SNP  
229 ( $r^2 > 0.40$ ) was reported for 23 of the 28 new loci in the TAGC GWAS<sup>26</sup>. SNPs at 16 of  
230 the 23 loci were associated with asthma in TAGC ( $p < 0.05$ ) and had the same direction  
231 of effects as in the UKB GWASs (appendix Table 2). To test for potential effects of  
232 asthma diagnostic criteria on the GWAS results, we conducted a GWAS comparing  
233 individuals with asthma based on self-reported doctor diagnosis alone compared to  
234 those with self-reported doctor diagnosis plus ICD10 codes. There were no differences  
235 detected between these two groups (appendix Figure 3), indicating that differences  
236 between these groups are not influencing the GWAS results discussed above.

237 As in previous GWASs comprised largely of children, the most significant locus in  
238 the childhood onset GWAS is at 17q12<sup>27</sup>, with the lead SNP in the *GSDMB* gene  
239 (Figure 1A). However, the estimated ORs for the lead SNPs at three other loci were  
240 similar to or larger than the lead SNP at the 17q locus. The lead SNPs in *IL1RL1* at  
241 2q12.1 and in *EMSY* at 11q13.5 had effect sizes on childhood onset asthma similar to  
242 the lead SNP in *GSDMB* on 17q (Table 2). Both loci have been prominent in previous  
243 asthma GWAS. The lead SNP at the 1q21.3 locus, corresponding to a nonsense  
244 mutation (R501X) in the filaggrin (*FLG*) gene at 1q21.3, had the largest OR overall.  
245 Variants in *FLG* have been robustly associated with food allergies<sup>28-30</sup> and atopic  
246 dermatitis<sup>31-33</sup>, but previous associations with asthma have been in the context of other  
247 allergic conditions<sup>21,34</sup>. Whether variants in *FLG* are associated with risk for childhood  
248 onset asthma independent of its effects on early life allergic disease is yet unknown.

249 To address this possibility, we repeated the childhood onset GWAS after  
250 excluding 3,205 childhood onset cases and 5,785 controls who reported having a  
251 history of allergic rhinitis, AD or food allergy. As expected in a smaller sample the p-  
252 values were overall larger, but the ORs were strikingly similar (appendix Figure 4 and  
253 Table 3). Even though the OR at the *FLG* locus on 1q21.3 decreased from 1.97 (95%  
254 CI 1.82, 2.13) to 1.61 (95% CI 1.49, 1.74), it remained both highly significant  
255 ( $p=2.45 \times 10^{-19}$ ) and the largest OR for childhood onset. These results suggest both a  
256 critical role for the allergic diathesis in the development of asthma in childhood and a  
257 shared architecture between allergic disease and childhood onset asthma, as previously  
258 discussed<sup>34,35</sup>.

259           The most significant association in the adult onset GWAS was in the HLA region,  
260 with independent associations at the HLA-C/B (6p21·33) and HLA-DR/DQ (6p21·32)  
261 loci (Figure 1B). Compared to the childhood onset GWAS, effect sizes were quite small  
262 in adult onset cases, with ORs reaching 1·1 at only five loci (2q12.1, 6p21.33, 6p21.32,  
263 9p24.1, 10p14) (Table 2).

264           Among the 61 asthma loci, 23 were specific to childhood onset asthma and one  
265 was specific to adult onset asthma (Table 2A-B). Regional association plots for the 23  
266 loci with childhood or adult onset specific effects are shown in appendix Figure 5.  
267 Among the remaining 38 shared loci (Table 2C), mean ORs were larger in the childhood  
268 onset cases at all but six loci (permutation test  $p < 10^{-4}$ ; appendix pp 8-9), indicating that  
269 both more loci contribute to childhood onset asthma and even among shared loci, effect  
270 sizes are larger in childhood onset asthma cases (Figure 2). Colocalization analyses  
271 using GWAS-PW<sup>36</sup> yielded results that supported our classification of age of onset  
272 specific and shared loci (appendix Table 4).

273           Finally, to directly test for loci associated with asthma age of onset, we  
274 conducted a third GWAS including all asthma cases in UKB who met our inclusion  
275 criteria ( $n=37,846$ ). In this analysis, 19 loci were associated with age of onset ( $p < 5 \times 10^{-8}$ )  
276 (appendix Figure 6 and Table 5). Age of onset loci overlapped with both the childhood  
277 and adult onset specific and shared loci, and asthma risk alleles at all but 2 loci were  
278 associated with earlier age of onset (11q12 in the *FADS2* gene and 12q13.11 near the  
279 *VDR* gene) (Table 2; Figure 2). SNPs at the 1q21.3 locus (*FLG*) had the largest effect  
280 on age of onset, with each copy of the asthma risk allele (rs61816761) associated on  
281 average with 4·57 (SE 0·43) years earlier onset compared to individuals without the risk

282 allele ( $p=8.15 \times 10^{-27}$ ). At the 17q12 locus (rs4795399) each copy of the risk allele was  
283 associated on average with 2.29 (SE 0.13) years earlier onset compared to individuals  
284 without the risk allele ( $p=6.76 \times 10^{-65}$ ). Examples of significant age of onset effects at  
285 these and other loci are shown in Figure 3. Overall, both childhood onset specific and  
286 shared asthma risk loci were associated with younger ages of onset, and alleles at loci  
287 associated with younger ages of onset had larger effects compared to alleles at loci  
288 associated with later ages of onset. These results are consistent with a previous GWAS  
289 of age of asthma onset in European ancestry subjects that reported five genome-wide  
290 significant and three suggestive significant loci, all associated with earlier age of  
291 onset<sup>37</sup>. Six of those 8 loci are also associated with age of onset in the UKB GWAS  
292 (appendix Table 6).

293

#### 294 SNP-based heritability ( $h^2$ )

295 We used LD score regression to estimate the heritabilities of childhood onset asthma,  
296 adult onset asthma, and age of asthma onset. Consistent with the number of associated  
297 SNPs and their effect sizes, estimated heritabilities were 0.33 for childhood onset  
298 asthma, 0.098 for adult onset asthma, and 0.14 for age of asthma onset. After  
299 excluding the significant SNPs (Table 2), estimates were reduced to 0.21, 0.082, and  
300 0.087, respectively, indicating that the associated SNPs account for 0.11 of the  
301 variance in childhood onset asthma risk, 0.016 of the variance in adult onset risk, and  
302 0.049 of the variance in age of asthma onset risk. These results reflect the more  
303 significant role for genetic variation in risk for childhood onset compared to adult onset

304 asthma and, conversely, the larger role for environmental variation in risk for adult onset  
305 compared to childhood onset asthma.

306

### 307 Tissue-specific expression of genes at associated loci

308 Using an unbiased approach, we asked whether the tissue-specific expression of genes  
309 that map to the 52 childhood onset loci differed from the tissue-specific expression of  
310 genes mapped to the 19 adult onset loci. Genes at childhood onset loci (Figure 1A)  
311 were most highly expressed in skin, whole blood, and small intestine (lower ileum)  
312 compared to all other tissues, whereas genes at adult onset loci (Figure 1B) were most  
313 highly expression in lung, whole blood, small intestine (lower ileum), and spleen  
314 (enrichment for higher expression,  $p < 10 \times 10^{-3}$ ) (appendix Figure 7 and Table 7). These  
315 patterns suggest both overlapping and distinct underlying mechanisms associated with  
316 asthma that begins in childhood and asthma with onset in adulthood.

317

### 318 Predicted transcriptome-wide association test

319 To better understand molecular mechanisms and to narrow the list of candidate causal  
320 genes at associated loci, we focused on the five tissues that most highly expressed the  
321 genes at childhood onset or adult onset loci: skin, lung tissue, whole blood, small  
322 intestine, and spleen. We used PrediXcan<sup>17</sup> to identify genes whose expression is  
323 predicted by variants associated with asthma in the childhood onset or adult onset  
324 GWAS and potentially mediate the effects of associated SNPs on asthma risk.

325 This analysis identified 113 unique, candidate causal genes at 22 of the 61  
326 GWAS loci ( $p < 1.4 \times 10^{-6}$ ) (Figures 4-5) (appendix Figures 8-9 and Table 8). These

327 included 39 genes associated with childhood onset asthma at eight of the childhood  
328 onset specific loci and 76 genes associated with childhood and/or adult onset asthma at  
329 13 of the shared loci. Variants at the one adult onset specific locus at 2q22·3 did not  
330 predict the expression of any genes in the five tissues.

331 The predicted genes most significantly associated with childhood onset asthma  
332 were at the 17q12 locus (Z score >10) in skin (*ORMDL3*, *ERBB2*, *PGAP3*, *GSDMA*, 2  
333 long noncoding RNAs), lung (*ORMDL3*, *GSDMB*, *GSDMA*, *PGAP3*, *PNMT*), blood  
334 (*ORMDL3*, *GSDMB*, *IKZF3*, *MED24*), small intestine (*GSDMA*, *GSDMB*, *PGAP3*), and  
335 spleen (*ORMDL3*, *GSDMB*, *ZPBP2*, *MED24*). Some genes were predicted to be more  
336 highly expressed in individuals with asthma (e.g., *ORMDL3*, *GSDMB*, *PGAP3*, *ERBB2*),  
337 while others were predicted to be less expressed in individuals with asthma (e.g.,  
338 *GSDMA*, *MED24*, *IKZF3*) (Figure 4A). This pattern of expression reflects the broad  
339 regulatory effects of SNPs and tissue specificity of gene expression at this locus<sup>27</sup>. The  
340 childhood onset asthma locus at 1q21.3 includes genes essential for epidermal  
341 differentiation and maintaining essential barrier function. The predicted expression of  
342 nine genes at this locus were associated with childhood onset asthma. Higher predicted  
343 expression of *CRNN*, *CRCT1* and *THEM5* in skin, of *PSDM4* in lung and blood, and of  
344 *LINGO4* in skin, lung, and blood were associated with increased asthma risk. Lower  
345 predicted expression of *SPRR2D* in skin, of *S100A12* in lung and blood, of *FLG* in skin,  
346 lung and spleen, and of *TDRKH* in skin, lung, blood and spleen were associated with  
347 increased asthma risk. *S100A12* has been previously implicated in asthma<sup>38</sup> and *FLG*  
348 variants have been associated with atopic dermatitis and food allergies, and asthma in  
349 the context of other allergic diseases<sup>21,28-34</sup>. Other childhood onset specific genes



350 previously implicated in asthma but not previously reported in asthma GWASs are  
351 *CCL20*<sup>39</sup> at 2q36.3 and *TLR10*<sup>40</sup> at 4p14 in whole blood, and *TLR6*<sup>41,42</sup> at 4p14, *AP5B1*  
352 at 11q13.1 and *SERPINB7*<sup>43</sup> at 18q21.33 in skin.

353 The 5q31.1 region had independent loci that were both childhood onset specific  
354 and shared in the GWASs. Although the predicted expression of all eight asthma genes  
355 at this extended locus were shared, five genes were more significantly associated with  
356 childhood onset asthma: higher predicted expression of *RAD50* in skin but lower  
357 predicted expression of *SEPT8* in skin and lung, *IL4* in skin, lung and blood, and *AFF4*  
358 small intestine were associated with increased risk for asthma (Figure 4B). The  
359 remaining three genes had similar associations with childhood and adult onset asthma,  
360 with predicted lower expression of *IRF1* in skin and spleen and predicted higher  
361 expression of *PDLIM4* in skin and *SLC22A5* in all five tissues associated with increased  
362 asthma risk. *IL4*, *RAD50*, *SLC22A5* and *PDLIM4* have been highlighted in previous  
363 asthma GWAS<sup>26,44</sup>, and *KIF3A* was identified in a GWAS of the atopic march<sup>45</sup> and  
364 associated with childhood onset asthma in a candidate gene study<sup>46</sup>.

365 In contrast to all other loci, predicted expression of 44 genes at two independent  
366 shared loci in the HLA region (6p21.32 and 6p21.33; referred to as the HLA region from  
367 hereon in) were associated with childhood asthma only (n=1; in skin and lung), adult  
368 onset asthma only (n=3; in skin only), or both (n=39; in multiple tissues). (Figure 5). The  
369 sheer number of genes in this region with predicted expression associated with asthma,  
370 the generally broad tissue expression patterns, and three associated with asthma only  
371 in adult onset cases are consistent with this locus being among the two most significant

372 loci in nearly all asthma GWASs, and the most significant locus in a previous small  
373 GWASs of adult onset asthma<sup>7</sup> and in adults with asthma<sup>44,47</sup>.

374       Among the remaining 37 shared loci (Figure 2B), SNPs at 12 predicted the  
375 expression of 23 unique genes, all of which were associated with both childhood onset  
376 and adult onset asthma. These include *IL18R1*, *IL18RAP*, and *ILRL2* at 2q12·1 in  
377 multiple tissues, *TSLP* at 5q22.1 in skin, *SMAD3* at 15q22·33 in skin and blood, *LRP1*  
378 at 12q13·3 in skin, *IL4R* at 16p12.1 in blood, and *CLEC16A* at 16p13.13 in lung. Loci  
379 associated with *IL18R1*, *IL18RAP*, *IL18RAP*, *ILRL2*, *TSLP*, *SMAD3*, *LRP1*, *IL4R* and  
380 *CLEC16A* were reported in previous asthma GWAS<sup>21,26,36</sup>.

381

## 382 Discussion

383 We report here the first large GWAS of both childhood and adult onset cases. To both  
384 maximize our power to detect differences and minimize the likelihood of  
385 misclassification, we considered doctor diagnosed asthma before the age of 12 years  
386 as childhood onset asthma and doctor diagnosed asthma after the age of 25 years as  
387 adult onset asthma. These GWASs revealed 61 independent asthma loci, 23 specific to  
388 childhood onset, one specific to adult onset, and 37 shared; with overall larger effect  
389 sizes for childhood onset asthma at nearly all loci. Moreover, the predicted expression  
390 of 41 of the 113 implicated genes were associated specifically with childhood onset  
391 asthma, compared to the predicted expression of three genes associated specifically  
392 with adult onset asthma. Our findings of more childhood onset asthma loci and  
393 potentially causal genes, and the larger effect sizes of risk alleles in childhood onset  
394 cases are particularly striking given that there were nearly 2·5-times more adult onset

395 than childhood onset cases in this study. Thus, despite having substantially less power  
396 to detect loci specific to childhood onset asthma, our analyses revealed many more  
397 childhood onset asthma loci. Similarly, the asthma risk alleles at 19 loci that were  
398 significant in the age of onset GWAS were all associated with younger age of onset.  
399 Finally, we showed that the SNP-based heritability of childhood onset asthma is over 3-  
400 times larger than the SNP-based heritability of adult onset asthma. These findings are  
401 consistent with previous studies showing decreased estimates of asthma heritability  
402 with increasing age of onset<sup>48</sup>, age of onset SNPs associated with earlier age of  
403 onset<sup>37</sup>, and an additive, unweighted genetic risk score comprised of 15 SNPs at eight  
404 asthma-associated loci associated with earlier age of onset<sup>49</sup>. Our study further shows  
405 that genetic risk for adult onset asthma is largely a subset of the genetic risk loci for  
406 childhood onset asthma, but with overall smaller effect sizes, consistent with a larger  
407 role for environmental risk factors in adult onset asthma.

408         Despite the overlap of adult onset and childhood onset loci, distinct mechanisms  
409 contributing to each were suggested by tissue enrichments: childhood onset loci were  
410 enriched for genes with highest expression in skin whereas adult onset loci were  
411 enriched for genes with highest expression in lung and spleen; both were enriched for  
412 genes highly expressed in whole blood and small intestine. The highlighting of skin as a  
413 target tissue for childhood onset asthma supports the widely held idea that asthma in  
414 childhood is due to impaired barrier function in the skin and other epithelial surfaces.  
415 This model proposes that compromised epithelial barriers promote sensitization to food  
416 and airway allergens and to wheezing illnesses in early life<sup>35,50</sup>. In fact, childhood onset  
417 specific loci identified here have been associated with atopic dermatitis or food allergies,

418 such as *FLG* on 1q21·3 with the atopic march<sup>45</sup>, atopic dermatitis<sup>31-33</sup> and food  
419 allergies<sup>28-30</sup>, *KIF3A* on 5q31.1 and *AP5B1/OVOL1* on 11q13.1 with the the atopic  
420 march<sup>45</sup> and atopic dermatitis<sup>51</sup>, *SERPINB7* on 18q21.33 with food allergies<sup>43</sup>, and  
421 *CRNN* (cornulin) on 1q21·3 with atopic dermatitis concomitant with asthma and reduced  
422 expression in atopic dermatitis-affected skin<sup>52</sup>. Variants at those loci were all associated  
423 with earlier age of asthma onset. We further show that these loci are associated with  
424 childhood onset asthma, even after exclusion of cases with a history of allergic  
425 diseases. In contrast, the enrichment for genes highly expressed in lung and spleen at  
426 adult onset loci suggests a more lung-centered, and potentially immune mediated,  
427 etiology for asthma with onset later in life. The prominent role of the HLA region in the  
428 adult onset asthma GWAS and the fact that predicted expression of three HLA region  
429 genes was associated only with adult onset asthma further highlights a central role for  
430 immune processes driving asthma pathogenesis in adults. The fact that both childhood  
431 onset and adult onset asthma loci were enriched for genes that are most highly  
432 expressed in whole blood cells and small intestine further indicate a shared immune  
433 etiology, as suggested from a large GWAS that included both children and adults<sup>26</sup>.

434 Combining GWAS with a transcriptome-wide association test that uses  
435 combinations of associated SNPs to predict gene expression in different tissues  
436 revealed significant complexity at the two most highly associated asthma loci. SNPs at  
437 the 17q12 locus predicted expression of 18 childhood onset asthma genes and SNPs at  
438 the HLA region predicted expression of 42 genes: three were associated with adult  
439 onset asthma and most were not HLA genes *per se*. In this regard, it is notable that the  
440 *HLA-DRB1*, *HLA-DQB1*, and *HLA-DQA1* genes, which are the most associated HLA

441 loci with autoimmune diseases, are predicted to have reduced expression in both  
442 childhood onset and adult onset asthma. Instead, HLA genes with less clear functions  
443 have increased predicted expression in asthma (Figure 5). These results strengthen the  
444 argument that multiple genes contribute to asthma risk at the HLA and 17q12 loci and  
445 probably account for the highly significant GWAS p-values observed at these loci in  
446 nearly all studies. It is also likely that these genes have both tissue specific and broad  
447 effects in epithelium, lung, and immune tissues.

448         The new loci identified in our study include the first adult onset asthma specific  
449 association at 2q22.3. The lead SNP at 2q22.3 is intergenic between *TEX41* and  
450 *ACVR2A*. The predicted expression of *ACVR2A* was not associated with asthma in our  
451 study, despite it being expressed in lung, blood, small intestine and spleen. *TEX41* was  
452 not expressed in any of the five tissues investigated. Interestingly, a GWAS also  
453 performed in UKB subjects implicated variants near *TEX41* in heavy vs. never smoking  
454 behavior<sup>53</sup>. However, even after removing adult onset cases and controls with reported  
455 ‘ever smoking’, the p-value for this SNP remained significant and the OR slightly  
456 increased (OR 1.077 [95% CI 1.05, 1.1],  $p=2.26 \times 10^{-8}$ ;  $n=12,132$  cases and 176,704  
457 controls). Variants in or near this gene, which encodes a lincRNA, have been  
458 associated with cardiovascular and immune mediated traits<sup>54</sup>, making this a potentially  
459 interesting candidate gene for adult onset asthma.

460         Our study had limitations. First, diagnoses of asthma and allergic disease in  
461 study subjects were from self reported doctor diagnosis and medical records (ICD10  
462 codes). Thus, it is possible that diagnoses, age of onset, or both are misspecified in  
463 some subjects. On the one hand, the large sample size and our ability to replicate

464 nearly all previously reported asthma loci (appendix Tables 2 and 9) suggest that our  
465 analyses were robust to any inaccuracies in the data. On the other hand, it is possible  
466 that subjects with adult onset asthma included cases with poor recall of childhood onset  
467 asthma in which symptoms remitted and then relapsed later in life<sup>55</sup> or misclassified  
468 cases of COPD among the older age groups. Our sensitivity analysis suggested that if  
469 even as few as 5% of the adult onset cases were misclassified we should have  
470 observed some signal of association at childhood onset loci, which we did not. The fact  
471 that the odds ratios for asthma at shared loci are relatively similar from approximately  
472 age 25 to age 65 (Figure 3) and that we do not detect any association signal at the  
473 major COPD locus on chromosome 15q25.1 (appendix Figure 10), further suggests that  
474 there is negligible misclassification of cases in the older age groups. Second, although  
475 we used stringent criteria to classify loci as childhood or adult onset specific, we can't  
476 exclude the possibility that in infinitely large sample sizes the effect sizes of some of  
477 these loci will have 95% CIs that overlap or the association p-value will become smaller  
478 than 0.05. Conversely, some of the shared loci with modest p-values in the adult onset  
479 cases may not be true risk loci for asthma with onset at older ages. Third, the gene  
480 expression data used to predict candidate target genes included heterogeneous tissues  
481 and were collected mostly from adults. As a result, our study may have missed relevant  
482 genes whose expression is developmentally regulated or environment specific. Our  
483 finding of candidate genes at only 22 of the 61 asthma loci may be due in part to the  
484 importance of both in asthma pathogenesis. Moreover, all inference based on gene  
485 expression is using imputed expression. It is possible, therefore, that some relevant  
486 genes were more difficult to impute and not included in our analysis, although a recent

487 comparative study showed that PrediXcan is a more robust method for prediction of  
488 gene expression than other related methods<sup>56</sup>. Fourth, because of the ethnic  
489 composition of UKB, this study was limited to individuals of European ancestry only. As  
490 a result, we could not evaluate the genetic risk architecture or assess the effects of age  
491 of onset specific loci in other populations.

492 In the largest asthma GWAS to date, we show that genetic risk loci for adult  
493 onset asthma is largely a subset of the loci associated with childhood onset asthma,  
494 with overall smaller effect sizes for onset at later ages. These data suggest that  
495 childhood onset specific loci and those associated with age of onset play a role in  
496 disease initiation, whereas the other associated loci reflect shared mechanisms of  
497 disease progression. The differences in the target tissues that most highly express the  
498 genes at associated loci and the predicted expression of genes at age specific and  
499 shared loci provides additional genetic and molecular evidence for both shared and  
500 distinct pathogenic mechanisms in childhood onset and adult onset asthma. It is  
501 therefore possible that the most effective treatments will also differ between these two  
502 groups, and that strategies for precision medicine should be further personalized to  
503 account for age of asthma onset.

504

#### 505 Author's Contributions

506 All authors were involved in the conception and design of the study and in writing the  
507 manuscript. MP and NS conducted all analyses and prepared figures and tables, under  
508 the overall supervision of DLN, CO, and HKI.

509

510 URLs

511 UK Biobank, [<https://www.ukbiobank.ac.uk/>]

512 Hail: <https://github.com/hail-is/hail>

513

514 Acknowledgements

515 This research has been conducted using UK Biobank Resource under Application

516 Number 19526.

517

518 Conflict of Interest

519 Dr. Im reports personal fees from AbbVie, personal fees from GSK, outside the

520 submitted work. The other authors declare no conflicts of interest.



## 521 References

- 522 1. Collaborators GBDCRD. Global, regional, and national deaths, prevalence,  
523 disability-adjusted life years, and years lived with disability for chronic obstructive  
524 pulmonary disease and asthma, 1990-2015: a systematic analysis for the Global  
525 Burden of Disease Study 2015. *Lancet Respir Med* 2017; **5**(9): 691-706.
- 526 2. Bush A, Menzies-Gow A. Phenotypic differences between pediatric and adult  
527 asthma. *Proc Am Thorac Soc* 2009; **6**(8): 712-9.
- 528 3. Busse W, Banks-Schlegel SP, Larsen GL. Childhood- versus adult-onset  
529 asthma. *Am J Respir Crit Care Med* 1995; **151**(5): 1635-9.
- 530 4. Dijk FN, de Jongste JC, Postma DS, Koppelman GH. Genetics of onset of  
531 asthma. *Curr Opin Allergy Clin Immunol* 2013; **13**(2): 193-202.
- 532 5. Holloway JW, Arshad SH, Holgate ST. Using genetics to predict the natural  
533 history of asthma? *J Allergy Clin Immunol* 2010; **126**(2): 200-9; quiz 10-1.
- 534 6. Bouzigon E, Corda E, Aschard H, et al. Effect of 17q21 variants and smoking  
535 exposure in early-onset asthma. *N Engl J Med* 2008; **359**(19): 1985-94.
- 536 7. Moffatt MF, Gut IG, Demenais F, et al. A large-scale, consortium-based  
537 genomewide association study of asthma. *N Engl J Med* 2010; **363**(13): 1211-21.
- 538 8. Bycroft C, Freeman C, Petkova D, et al. The UK Biobank resource with deep  
539 phenotyping and genomic data. *Nature* 2018; **562**(7726): 203-9.
- 540 9. Mukherjee M, Stoddart A, Gupta RP, et al. The epidemiology, healthcare and  
541 societal burden and costs of asthma in the UK and its member nations: analyses of  
542 standalone and linked national databases. *BMC Med* 2016; **14**(1): 113.

- 543 10. Fry A, Littlejohns TJ, Sudlow C, et al. Comparison of Sociodemographic and  
544 Health-Related Characteristics of UK Biobank Participants With Those of the General  
545 Population. *Am J Epidemiol* 2017; **186**(9): 1026-34.
- 546 11. Pividori M, Im HK. ukbREST: efficient and streamlined data access for  
547 reproducible research in large biobanks. *Bioinformatics* 2018.
- 548 12. Heath AP, Greenway M, Powell R, et al. Bionimbus: a cloud for managing,  
549 analyzing and sharing large genomics datasets. *J Am Med Inform Assoc* 2014; **21**(6):  
550 969-75.
- 551 13. Watanabe K, Taskesen E, van Bochoven A, Posthuma D. Functional mapping  
552 and annotation of genetic associations with FUMA. *Nature communications* 2017; **8**(1):  
553 1826.
- 554 14. Consortium TGP, Auton A, Brooks LD, et al. A global reference for human  
555 genetic variation. *Nature* 2015; **526**(7571): 68-74.
- 556 15. Bulik-Sullivan BK, Loh PR, Finucane HK, et al. LD Score regression  
557 distinguishes confounding from polygenicity in genome-wide association studies. *Nat*  
558 *Genet* 2015; **47**(3): 291-5.
- 559 16. <https://www.asthma.org.uk/get-involved/campaigns/data-visualisations/>.
- 560 17. Gamazon ER, Wheeler HE, Shah KP, et al. A gene-based association method  
561 for mapping traits using reference transcriptome data. *Nat Genet* 2015; **47**(9): 1091-8.
- 562 18. Barbeira AN, Dickinson SP, Bonazzola R, et al. Exploring the phenotypic  
563 consequences of tissue specific gene expression variation inferred from GWAS  
564 summary statistics. *Nature communications* 2018; **9**(1): 1825.

- 565 19. Battle A, Brown CD, Engelhardt BE, Montgomery SB. Genetic effects on gene  
566 expression across human tissues. *Nature* 2017; **550**(7675): 204-13.
- 567 20. MacArthur J, Bowler E, Cerezo M, et al. The new NHGRI-EBI Catalog of  
568 published genome-wide association studies (GWAS Catalog). *Nucleic Acids Res* 2017;  
569 **45**(D1): D896-D901.
- 570 21. Zhu Z, Lee PH, Chaffin MD, et al. A genome-wide cross-trait analysis from UK  
571 Biobank highlights the shared genetic architecture of asthma and allergic diseases. *Nat*  
572 *Genet* 2018.
- 573 22. Standl M, Sausenthaler S, Lattka E, et al. FADS gene cluster modulates the  
574 effect of breastfeeding on asthma. Results from the GINIplus and LISAplus studies.  
575 *Allergy* 2012; **67**(1): 83-90.
- 576 23. Rousseau K, Byrne C, Griesinger G, et al. Allelic association and recombination  
577 hotspots in the mucin gene (MUC) complex on chromosome 11p15.5. *Ann Hum Genet*  
578 2007; **71**(Pt 5): 561-9.
- 579 24. Johnson L, Shah I, Loh AX, et al. MUC5AC and inflammatory mediators  
580 associated with respiratory outcomes in the British 1946 birth cohort. *Respirology* 2013;  
581 **18**(6): 1003-10.
- 582 25. Akahoshi M, Obara K, Hirota T, et al. Functional promoter polymorphism in the  
583 TBX21 gene associated with aspirin-induced asthma. *Human genetics* 2005; **117**(1):  
584 16-26.
- 585 26. Demenais F, Margaritte-Jeannin P, Barnes KC, et al. Multiancestry association  
586 study identifies new asthma risk loci that colocalize with immune-cell enhancer marks.  
587 *Nat Genet* 2018; **50**(1): 42-53.

- 588 27. Stein MM, Thompson EE, Schoettler N, et al. A decade of research on the  
589 17q12-21 asthma locus: Piecing together the puzzle. *J Allergy Clin Immunol* 2018;  
590 **142**(3): 749-64 e3.
- 591 28. Brown SJ, Asai Y, Cordell HJ, et al. Loss-of-function variants in the filaggrin gene  
592 are a significant risk factor for peanut allergy. *J Allergy Clin Immunol* 2011; **127**(3): 661-  
593 7.
- 594 29. Marenholz I, Kerscher T, Bauerfeind A, et al. An interaction between filaggrin  
595 mutations and early food sensitization improves the prediction of childhood asthma. *J*  
596 *Allergy Clin Immunol* 2009; **123**(4): 911-6.
- 597 30. Venkataraman D, Soto-Ramirez N, Kurukulaaratchy RJ, et al. Filaggrin loss-of-  
598 function mutations are associated with food allergy in childhood and adolescence. *J*  
599 *Allergy Clin Immunol* 2014; **134**(4): 876-82 e4.
- 600 31. Bisgaard H, Halkjaer LB, Hinge R, et al. Risk analysis of early childhood eczema.  
601 *J Allergy Clin Immunol* 2009; **123**(6): 1355-60 e5.
- 602 32. Palmer CN, Irvine AD, Terron-Kwiatkowski A, et al. Common loss-of-function  
603 variants of the epidermal barrier protein filaggrin are a major predisposing factor for  
604 atopic dermatitis. *Nat Genet* 2006; **38**(4): 441-6.
- 605 33. Weidinger S, Illig T, Baurecht H, et al. Loss-of-function variations within the  
606 filaggrin gene predispose for atopic dermatitis with allergic sensitizations. *J Allergy Clin*  
607 *Immunol* 2006; **118**(1): 214-9.
- 608 34. Ferreira MA, Vonk JM, Baurecht H, et al. Shared genetic origin of asthma, hay  
609 fever and eczema elucidates allergic disease biology. *Nat Genet* 2017; **49**(12): 1752-7.

- 610 35. Busse WW. The atopic march: Fact or folklore? *Ann Allergy Asthma Immunol*  
611 2018; **120**(2): 116-8.
- 612 36. Pickrell JK, Berisa T, Liu JZ, Segurel L, Tung JY, Hinds DA. Detection and  
613 interpretation of shared genetic influences on 42 human traits. *Nat Genet* 2016; **48**(7):  
614 709-17.
- 615 37. Sarnowski C, Sugier PE, Granell R, et al. Identification of a new locus at 16q12  
616 associated with time to asthma onset. *J Allergy Clin Immunol* 2016; **138**(4): 1071-80.
- 617 38. Yang Z, Yan WX, Cai H, et al. S100A12 provokes mast cell activation: a potential  
618 amplification pathway in asthma and innate immunity. *J Allergy Clin Immunol* 2007;  
619 **119**(1): 106-14.
- 620 39. Collison A, Hatchwell L, Verrills N, et al. The E3 ubiquitin ligase midline 1  
621 promotes allergen and rhinovirus-induced asthma by inhibiting protein phosphatase 2A  
622 activity. *Nat Med* 2013; **19**(2): 232-7.
- 623 40. Lazarus R, Raby BA, Lange C, et al. TOLL-like receptor 10 genetic variation is  
624 associated with asthma in two independent samples. *Am J Respir Crit Care Med* 2004;  
625 **170**(6): 594-600.
- 626 41. Tantisira K, Klimecki WT, Lazarus R, et al. Toll-like receptor 6 gene (TLR6):  
627 single-nucleotide polymorphism frequencies and preliminary association with the  
628 diagnosis of asthma. *Genes Immun* 2004; **5**(5): 343-6.
- 629 42. Lau MY, Dharmage SC, Burgess JA, et al. The interaction between farming/rural  
630 environment and TLR2, TLR4, TLR6 and CD14 genetic polymorphisms in relation to  
631 early- and late-onset asthma. *Sci Rep* 2017; **7**: 43681.

- 632 43. Marenholz I, Grosche S, Kalb B, et al. Genome-wide association study identifies  
633 the SERPINB gene cluster as a susceptibility locus for food allergy. *Nature*  
634 *communications* 2017; **8**(1): 1056.
- 635 44. Li X, Howard TD, Zheng SL, et al. Genome-wide association study of asthma  
636 identifies RAD50-IL13 and HLA-DR/DQ regions. *J Allergy Clin Immunol* 2010; **125**(2):  
637 328-35 e11.
- 638 45. Marenholz I, Esparza-Gordillo J, Ruschendorf F, et al. Meta-analysis identifies  
639 seven susceptibility loci involved in the atopic march. *Nature communications* 2015; **6**:  
640 8804.
- 641 46. Kovacic MB, Myers JM, Wang N, et al. Identification of KIF3A as a novel  
642 candidate gene for childhood asthma using RNA expression and population allelic  
643 frequencies differences. *PloS one* 2011; **6**(8): e23714.
- 644 47. Lasky-Su J, Himes BE, Raby BA, et al. HLA-DQ strikes again: genome-wide  
645 association study further confirms HLA-DQ in the diagnosis of asthma among adults.  
646 *Clin Exp Allergy* 2012; **42**(12): 1724-33.
- 647 48. Thomsen SF, Duffy DL, Kyvik KO, Backer V. Genetic influence on the age at  
648 onset of asthma: a twin study. *J Allergy Clin Immunol* 2010; **126**(3): 626-30.
- 649 49. Belsky DW, Sears MR, Hancox RJ, et al. Polygenic risk and the development  
650 and course of asthma: an analysis of data from a four-decade longitudinal study. *Lancet*  
651 *Respir Med* 2013; **1**(6): 453-61.
- 652 50. Han H, Roan F, Ziegler SF. The atopic march: current insights into skin barrier  
653 dysfunction and epithelial cell-derived cytokines. *Immunol Rev* 2017; **278**(1): 116-30.

- 654 51. Johansson E, Biagini Myers JM, Martin LJ, et al. KIF3A genetic variation is  
655 associated with pediatric asthma in the presence of eczema independent of allergic  
656 rhinitis. *J Allergy Clin Immunol* 2017; **140**(2): 595-8 e5.
- 657 52. Trzeciak M, Sakowicz-Burkiewicz M, Wesserling M, et al. Altered Expression of  
658 Genes Encoding Cornulin and Repetin in Atopic Dermatitis. *Int Arch Allergy Immunol*  
659 2017; **172**(1): 11-9.
- 660 53. Wain LV, Shrine N, Miller S, et al. Novel insights into the genetics of smoking  
661 behaviour, lung function, and chronic obstructive pulmonary disease (UK BiLEVE): a  
662 genetic association study in UK Biobank. *Lancet Respir Med* 2015; **3**(10): 769-81.
- 663 54. MacArthur DG, Balasubramanian S, Frankish A, et al. A systematic survey of  
664 loss-of-function variants in human protein-coding genes. *Science* 2012; **335**(6070): 823-  
665 8.
- 666 55. Sears MR, Greene JM, Willan AR, et al. A longitudinal, population-based, cohort  
667 study of childhood asthma followed to adulthood. *N Engl J Med* 2003; **349**(15): 1414-22.
- 668 56. Fryett JJ, Inshaw J, Morris AP, Cordell HJ. Comparison of methods for  
669 transcriptome imputation through application to two common complex diseases. *Eur J*  
670 *Hum Genet* 2018.

671

672 Table 1. Characteristics of the asthma cases and controls. NA, not applicable.

|                                                           | <b>Childhood Onset (N=9,433)</b> | <b>Adolescent or Young Adult Onset (N=6,849)</b> | <b>Adulthood Onset (N=21,564)</b> | <b>Controls (N=318,237)</b> |
|-----------------------------------------------------------|----------------------------------|--------------------------------------------------|-----------------------------------|-----------------------------|
| <b>Age at recruitment (yr)</b>                            |                                  |                                                  |                                   |                             |
| Mean ( $\pm$ SD)                                          | 55 $\pm$ 8                       | 52 $\pm$ 8                                       | 57 $\pm$ 8                        | 57 $\pm$ 8                  |
| Range                                                     | 40 - 70                          | 40 - 70                                          | 40 - 70                           | 39 - 73                     |
| <b>Age at asthma onset (yr)<sup>a</sup></b>               |                                  |                                                  |                                   |                             |
| Mean ( $\pm$ SD)                                          | 6 $\pm$ 3                        | 19 $\pm$ 4                                       | 44 $\pm$ 10                       | NA                          |
| Range                                                     | 0 - 11                           | 12 - 25                                          | 26 - 65                           | NA                          |
| <b>Sex (% female)</b>                                     | 40.7                             | 57.4                                             | 63.6                              | 53.5                        |
| <b>Asthma medication use in the past 12 months, N (%)</b> | 1,383 (14.7)                     | 1,124 (16.4)                                     | 4,081 (18.9)                      | NA                          |
| <b>Current smokers N (%)</b>                              | 802 (8.5)                        | 688 (10.0)                                       | 1,379 (6.4)                       | 30,056 (9.4)                |
| <b>Allergic diseases ever</b>                             |                                  |                                                  |                                   |                             |
| Allergic rhinitis, N (%)                                  | 2,537 (26.9)                     | 2,042 (29.8)                                     | 4,660 (21.6)                      | 27,289 (8.6)                |
| Atopic dermatitis, N (%)                                  | 1,126 (11.9)                     | 473 (6.9)                                        | 927 (4.3)                         | 7,168 (2.3)                 |
| Food allergy, N (%)                                       | 138 (1.5)                        | 63 (0.9)                                         | 172 (0.8)                         | 1,229 (0.4)                 |
| Any allergic disease, N (%)                               | 3,205 (34.0)                     | 2,321 (33.9)                                     | 5,306 (24.6)                      | 33,808 (10.6)               |

673



**Table 2. Regions with SNPs that were genome-wide significant in the childhood onset or adult onset GWAS.** Information for the SNP with smallest p-value at each locus is shown. Summary statistics for the 19 age of asthma onset significant SNPs are shown in appendix Table 5.

| Locus <sup>a</sup>                      | rsID        | Position <sup>b</sup> | Nearby Genes <sup>c</sup>            | Allele <sup>d</sup> | RAF <sup>e</sup> | Childhood Onset Asthma GWAS |             |          | Adult Onset Asthma GWAS |             |          | Age of Onset GWAS |       |          |
|-----------------------------------------|-------------|-----------------------|--------------------------------------|---------------------|------------------|-----------------------------|-------------|----------|-------------------------|-------------|----------|-------------------|-------|----------|
|                                         |             |                       |                                      |                     |                  | OR                          | 95% CI      | p-value  | OR                      | 95% CI      | p-value  | Beta              | SE    | p-value  |
| <b>A. Childhood Onset Specific Loci</b> |             |                       |                                      |                     |                  |                             |             |          |                         |             |          |                   |       |          |
| 1q21.3                                  | rs61816761  | 1:152285861           | <i>FLG, HRNR, FLG2</i>               | G/A                 | 0.024            | 1.970                       | 1.823-2.129 | 1.88E-65 | 1.016                   | 0.948-1.088 | 6.56E-01 | -4.571            | 0.426 | 8.15E-27 |
| 1q25.1                                  | rs7518129   | 1:173163568           | <i>TNFSF4, TNFSF18, PRDX6</i>        | A/G                 | 0.310            | 1.111                       | 1.077-1.146 | 2.21E-11 | 0.997                   | 0.977-1.019 | 8.17E-01 | -0.849            | 0.145 | 4.89E-09 |
| 2q36.3 <sup>f</sup>                     | rs10175070  | 2:228670575           | <i>CCL20, SLC18A3</i>                | A/G                 | 0.251            | 1.122                       | 1.086-1.160 | 4.31E-12 | 1.000                   | 0.978-1.023 | 9.92E-01 | -0.862            | 0.154 | 2.24E-08 |
| 3q28                                    | rs12634152  | 3:188121019           | <i>LPP, FLJ42393, LPP-ASI</i>        | C/T                 | 0.547            | 1.133                       | 1.100-1.166 | 1.08E-16 | 1.007                   | 0.987-1.027 | 4.98E-01 | -0.968            | 0.136 | 1.21E-12 |
| 4p14                                    | rs5743618   | 4:38798648            | <i>TLR1, TLR10, TLR6</i>             | A/C                 | 0.774            | 1.249                       | 1.203-1.295 | 3.19E-32 | 1.008                   | 0.985-1.032 | 5.09E-01 | -1.578            | 0.163 | 4.53E-22 |
| 5q13.2 <sup>f</sup>                     | rs10036789  | 5:71695918            | <i>PTCD2, ZNF366</i>                 | C/G                 | 0.460            | 1.085                       | 1.054-1.117 | 4.51E-08 | 1.016                   | 0.996-1.036 | 1.12E-01 | -0.511            | 0.137 | 1.95E-04 |
| 5q31.1                                  | rs2051809   | 5:132056874           | <i>KIF3A, IL4, CCN2</i>              | C/A                 | 0.247            | 1.175                       | 1.137-1.214 | 3.24E-22 | 1.016                   | 0.994-1.040 | 1.58E-01 | -0.933            | 0.155 | 1.59E-09 |
| 6p25.3 <sup>f</sup>                     | rs9391997   | 6:409119              | <i>IRF4, DUSP22, EXOC2</i>           | A/G                 | 0.527            | 1.102                       | 1.070-1.135 | 6.89E-11 | 0.995                   | 0.976-1.015 | 6.35E-01 | -0.597            | 0.136 | 1.06E-05 |
| 7p15.3 <sup>f</sup>                     | rs34880821  | 7:22775450            | <i>IL6, TOMM7</i>                    | G/A                 | 0.283            | 1.106                       | 1.071-1.141 | 4.73E-10 | 1.000                   | 0.979-1.022 | 9.88E-01 | -0.667            | 0.149 | 7.59E-06 |
| 8q24.21 <sup>f</sup>                    | rs13277355  | 8:128777719           | <i>MYC, TMEM75</i>                   | G/A                 | 0.274            | 1.110                       | 1.075-1.146 | 1.65E-10 | 1.013                   | 0.991-1.036 | 2.46E-01 | -0.660            | 0.151 | 1.20E-05 |
| 9q34.3 <sup>f</sup>                     | rs117137535 | 9:140500443           | <i>ARRDC1, ZMYND19, EHMT1</i>        | G/A                 | 0.026            | 1.307                       | 1.195-1.429 | 4.16E-09 | 0.977                   | 0.913-1.046 | 5.10E-01 | -2.464            | 0.446 | 3.42E-08 |
| 10p15.1 <sup>f</sup>                    | rs943451    | 10:6621773            | <i>PRKCO, PFKFB3, SFMBT2</i>         | C/T                 | 0.318            | 1.125                       | 1.091-1.161 | 7.51E-14 | 1.021                   | 1.000-1.043 | 5.30E-02 | -0.613            | 0.145 | 2.54E-05 |
| 11q13.1 <sup>f</sup>                    | rs479844    | 11:65551957           | <i>AP5B1, OVOL1</i>                  | A/G                 | 0.555            | 1.106                       | 1.074-1.139 | 1.48E-11 | 1.015                   | 0.995-1.035 | 1.41E-01 | -0.657            | 0.135 | 1.22E-06 |
| 11q23.3 <sup>f</sup>                    | rs12365699  | 11:118743286          | <i>CXCR5, DDX6</i>                   | A/G                 | 0.833            | 1.167                       | 1.120-1.216 | 1.57E-13 | 1.004                   | 0.978-1.031 | 7.43E-01 | -1.396            | 0.185 | 4.42E-14 |
| 12q13.2 <sup>f</sup>                    | rs62623446  | 12:55368291           | <i>TESPA1, MUC1, NEUROD4</i>         | C/T                 | 0.072            | 1.188                       | 1.127-1.252 | 1.40E-10 | 1.038                   | 0.999-1.077 | 5.32E-02 | -1.079            | 0.253 | 1.95E-05 |
| 12q24.12 <sup>f</sup>                   | rs10774625  | 12:111910219          | <i>ATXN2, SH2B3, BRAP</i>            | A/G                 | 0.504            | 1.087                       | 1.056-1.119 | 2.07E-08 | 0.997                   | 0.978-1.017 | 7.92E-01 | -0.713            | 0.135 | 1.43E-07 |
| 12q24.31 <sup>f</sup>                   | rs1696361   | 12:121363823          | <i>SPPL3, HNF1A</i>                  | C/T                 | 0.359            | 1.109                       | 1.076-1.142 | 1.19E-11 | 1.019                   | 0.998-1.040 | 6.96E-02 | -0.696            | 0.140 | 6.84E-07 |
| 17q12                                   | rs4795399   | 17:38061439           | <i>GSDMB, ZPBP2, ORMDL3</i>          | C/T                 | 0.529            | 1.406                       | 1.365-1.448 | 1.45E-11 | 1.005                   | 0.985-1.025 | 6.28E-01 | -2.286            | 0.134 | 6.76E-65 |
| 17q21.2 <sup>f</sup>                    | rs8066625   | 17:40390629           | <i>STAT5B, GHDC, STAT5A</i>          | G/A                 | 0.100            | 1.151                       | 1.098-1.206 | 4.90E-09 | 1.006                   | 0.973-1.040 | 7.33E-01 | -0.846            | 0.227 | 1.88E-04 |
| 17q21.32 <sup>f</sup>                   | rs56308324  | 17:45819206           | <i>TBX21, TBKBPI, OSBPL7</i>         | A/T                 | 0.132            | 1.132                       | 1.086-1.180 | 3.47E-09 | 1.025                   | 0.996-1.055 | 8.72E-02 | -0.714            | 0.195 | 2.54E-04 |
| 18q21.33 <sup>f</sup>                   | rs4574025   | 18:60009814           | <i>TNFRSF11A, KIAA1468, ZCCHC2</i>   | C/T                 | 0.535            | 1.090                       | 1.058-1.122 | 9.25E-09 | 0.986                   | 0.967-1.006 | 1.69E-01 | -0.871            | 0.136 | 1.61E-10 |
| 18q21.33 <sup>f</sup>                   | rs12964116  | 18:61442619           | <i>SERPINB7, SERPINB11, SERPINB2</i> | A/G                 | 0.036            | 1.336                       | 1.247-1.432 | 2.56E-16 | 1.005                   | 0.953-1.059 | 8.62E-01 | -1.916            | 0.351 | 4.87E-08 |
| 19p13.3 <sup>f</sup>                    | rs4807630   | 19:1170445            | <i>SBNO2, GPX4, STK11</i>            | C/T                 | 0.308            | 1.093                       | 1.060-1.128 | 2.06E-08 | 1.013                   | 0.992-1.035 | 2.32E-01 | -0.487            | 0.147 | 9.25E-04 |
| <b>B. Adult Onset Specific Loci</b>     |             |                       |                                      |                     |                  |                             |             |          |                         |             |          |                   |       |          |
| 2q22.3 <sup>f</sup>                     | rs12617922  | 2:146156679           | <i>TEX41, ACVR2A</i>                 | A/G                 | 0.518            | 0.983                       | 0.955-1.012 | 2.36E-01 | 1.066                   | 1.045-1.087 | 1.59E-10 | 0.478             | 0.136 | 4.46E-04 |
| <b>C. Shared Asthma Loci</b>            |             |                       |                                      |                     |                  |                             |             |          |                         |             |          |                   |       |          |
| 1q32.1                                  | rs12023876  | 1:203093201           | <i>ADORA1, PPFA4</i>                 | T/G                 | 0.668            | 1.102                       | 1.068-1.137 | 1.11E-09 | 1.032                   | 1.010-1.053 | 3.37E-03 | -0.567            | 0.144 | 8.65E-05 |
| 2p25.1                                  | rs13416555  | 2:8441735             | <i>RNF144A, ID2</i>                  | G/C                 | 0.705            | 1.130                       | 1.094-1.167 | 1.94E-13 | 1.040                   | 1.018-1.063 | 3.50E-04 | -0.715            | 0.150 | 1.91E-06 |
| 2q12.1                                  | rs72823641  | 2:102936159           | <i>IL1RL1, IL1RL2, IL18R1</i>        | A/T                 | 0.863            | 1.415                       | 1.349-1.484 | 3.01E-46 | 1.109                   | 1.077-1.142 | 3.72E-12 | -1.687            | 0.208 | 4.73E-16 |
| 2q37.3                                  | rs34290285  | 2:242698640           | <i>D2HGDH, INGS, GAL3ST2</i>         | A/G                 | 0.745            | 1.177                       | 1.137-1.219 | 2.06E-20 | 1.081                   | 1.056-1.106 | 2.16E-11 | -0.821            | 0.159 | 2.56E-07 |
| 3p22.3 <sup>f</sup>                     | rs35570272  | 3:33047662            | <i>GLB1, TRIM71, TMPPE</i>           | G/T                 | 0.396            | 1.100                       | 1.068-1.133 | 2.68E-10 | 1.046                   | 1.025-1.067 | 9.84E-06 | -0.454            | 0.138 | 1.03E-03 |
| 4q27                                    | rs2069763   | 4:123377482           | <i>IL2, ADAD1, IL21</i>              | C/A                 | 0.334            | 1.126                       | 1.092-1.160 | 1.59E-14 | 1.032                   | 1.011-1.054 | 2.44E-03 | -0.631            | 0.142 | 8.39E-06 |
| 5p15.2 <sup>f</sup>                     | rs16903574  | 5:14610309            | <i>FAM105A, TRIO, OTULIN</i>         | C/G                 | 0.077            | 1.236                       | 1.174-1.302 | 9.01E-16 | 1.052                   | 1.013-1.091 | 7.75E-03 | -1.055            | 0.250 | 2.51E-05 |
| 5q22.1                                  | rs1837253   | 5:110401872           | <i>SLC25A46, TSLP</i>                | T/C                 | 0.740            | 1.211                       | 1.169-1.253 | 2.33E-27 | 1.088                   | 1.064-1.113 | 2.77E-13 | -0.733            | 0.158 | 3.72E-06 |
| 5q31.1                                  | rs17622378  | 5:131778452           | <i>C5orf56, SLC22A5, IRF1</i>        | G/A                 | 0.573            | 1.103                       | 1.071-1.136 | 8.52E-11 | 1.077                   | 1.055-1.098 | 3.17E-13 | -0.044            | 0.137 | 7.46E-01 |
| 6p22.1                                  | rs1117490   | 6:30170510            | <i>TRIM26, TRIM15, TRIM39</i>        | T/C                 | 0.234            | 1.100                       | 1.063-1.137 | 2.78E-08 | 1.059                   | 1.036-1.084 | 6.83E-07 | -0.453            | 0.158 | 4.07E-03 |
| 6p21.33                                 | rs2428494   | 6:31322197            | <i>HLA-B, HLA-C, MICA</i>            | T/A                 | 0.477            | 1.157                       | 1.124-1.191 | 7.94E-23 | 1.104                   | 1.082-1.126 | 4.77E-23 | -0.648            | 0.136 | 1.78E-06 |
| 6p21.32                                 | rs28407950  | 6:32626348            | <i>HLA-DQA1, HLA-DQB</i>             | T/C                 | 0.756            | 1.354                       | 1.306-1.405 | 1.27E-59 | 1.148                   | 1.121-1.175 | 7.67E-31 | -1.284            | 0.163 | 4.03E-15 |
| 6q15                                    | rs1321859   | 6:91011673            | <i>BACH2, MAP3K7</i>                 | T/C                 | 0.649            | 1.102                       | 1.068-1.136 | 9.32E-10 | 1.076                   | 1.054-1.098 | 5.68E-12 | -0.268            | 0.144 | 6.28E-02 |
| 7p21.1 <sup>f</sup>                     | rs4473914   | 7:20426263            | <i>ITGB6, MACC1, ABCB5</i>           | C/T                 | 0.604            | 1.092                       | 1.060-1.125 | 9.02E-09 | 1.035                   | 1.014-1.056 | 8.44E-04 | -0.338            | 0.139 | 1.51E-02 |
| 7p15.1 <sup>f</sup>                     | rs917115    | 7:28172586            | <i>JAZF1, TAX1BP1, CREB5</i>         | T/C                 | 0.208            | 1.112                       | 1.074-1.152 | 1.73E-09 | 1.042                   | 1.017-1.067 | 7.35E-04 | -0.577            | 0.164 | 4.17E-04 |
| 8q21.13                                 | rs4739738   | 8:81291645            | <i>TPD52, ZBTB10</i>                 | A/G                 | 0.359            | 1.117                       | 1.084-1.151 | 3.45E-13 | 1.057                   | 1.036-1.079 | 8.63E-08 | -0.450            | 0.140 | 1.27E-03 |
| 9p24.1                                  | rs992969    | 9:6209697             | <i>RANBP6, IL33</i>                  | G/A                 | 0.252            | 1.248                       | 1.209-1.289 | 6.76E-42 | 1.100                   | 1.076-1.125 | 3.14E-17 | -1.026            | 0.152 | 1.35E-11 |
| 10p14 <sup>f</sup>                      | rs7894791   | 10:8591369            | <i>GATA3, CELF2</i>                  | A/C                 | 0.587            | 1.103                       | 1.071-1.137 | 9.43E-11 | 1.024                   | 1.004-1.045 | 1.94E-02 | -0.494            | 0.137 | 3.24E-04 |
| 10p14                                   | rs1775554   | 10:9054340            | <i>GATA3, CELF2</i>                  | C/A                 | 0.577            | 1.117                       | 1.084-1.150 | 2.85E-13 | 1.121                   | 1.098-1.143 | 5.17E-29 | -0.002            | 0.138 | 9.91E-01 |
| 11p15.5 <sup>f</sup>                    | rs12788104  | 11:1123739            | <i>MUC6, MUC5AC</i>                  | A/G                 | 0.688            | 1.029                       | 0.997-1.061 | 7.99E-02 | 1.064                   | 1.041-1.087 | 1.41E-08 | 0.147             | 0.148 | 3.22E-01 |

|                       |            |             |                                 |     |       |       |             |          |       |             |          |        |       |          |
|-----------------------|------------|-------------|---------------------------------|-----|-------|-------|-------------|----------|-------|-------------|----------|--------|-------|----------|
| 11q12.2 <sup>f</sup>  | rs174621   | 11:61630104 | <i>FADS2, FADS1, FADS3</i>      | A/G | 0.772 | 1.013 | 0.978-1.049 | 4.63E-01 | 1.071 | 1.046-1.097 | 1.46E-08 | 0.508  | 0.163 | 1.87E-03 |
| 11q13.5 <sup>g</sup>  | rs61894547 | 11:76248630 | <i>EMSY, THAP12, LRRC32</i>     | C/T | 0.052 | 1.463 | 1.382-1.548 | 2.17E-39 | 1.093 | 1.047-1.141 | 5.46E-05 | -2.227 | 0.284 | 4.42E-15 |
|                       | rs7936312  | 11:76293726 | <i>EMSY, LRRC32</i>             | G/T | 0.477 | 1.194 | 1.160-1.230 | 4.89E-33 | 1.060 | 1.040-1.081 | 4.10E-09 | -0.978 | 0.134 | 3.49E-13 |
| 12q13.11              | rs56389811 | 12:48205358 | <i>HDAC7, SLC48A1, VDR</i>      | T/C | 0.761 | 1.022 | 0.988-1.058 | 2.11E-01 | 1.078 | 1.054-1.104 | 2.36E-10 | 0.485  | 0.161 | 2.55E-03 |
| 12q13.2               | rs705699   | 12:56384804 | <i>RAB3B, CDK2, SUOX</i>        | G/A | 0.425 | 1.106 | 1.074-1.139 | 1.43E-11 | 1.052 | 1.031-1.072 | 6.10E-07 | -0.481 | 0.136 | 4.20E-04 |
| 12q13.3               | rs3122929  | 12:57509102 | <i>STAT6, NAB2, LRP1</i>        | C/T | 0.404 | 1.134 | 1.101-1.167 | 6.59E-17 | 1.061 | 1.040-1.082 | 5.73E-09 | -0.564 | 0.138 | 4.07E-05 |
| 12q21.1 <sup>f</sup>  | rs11178648 | 12:71533210 | <i>TSPAN8, PTPRR, LGR5</i>      | T/C | 0.592 | 1.087 | 1.055-1.120 | 4.16E-08 | 1.052 | 1.031-1.073 | 6.62E-07 | -0.183 | 0.138 | 1.86E-01 |
| 13q32.3 <sup>f</sup>  | rs1887704  | 13:99974492 | <i>UBAC2, DOCK9, TM9SF2</i>     | C/G | 0.681 | 1.124 | 1.089-1.161 | 5.48E-13 | 1.048 | 1.026-1.070 | 1.57E-05 | -0.476 | 0.147 | 1.15E-03 |
| 14q24.1               | rs1950897  | 14:68760141 | <i>RAD51B, ZFYVE26, ZFF36L1</i> | T/C | 0.287 | 1.096 | 1.062-1.131 | 1.38E-08 | 1.031 | 1.009-1.053 | 5.39E-03 | -0.520 | 0.148 | 4.52E-04 |
| 15q22.2               | rs11071559 | 15:61069988 | <i>RORA, ANXA2, VPS13C</i>      | T/C | 0.872 | 1.205 | 1.151-1.262 | 2.57E-15 | 1.069 | 1.037-1.101 | 1.22E-05 | -0.958 | 0.210 | 5.11E-06 |
| 15q22.33              | rs56062135 | 15:67455630 | <i>SMAD3, SMAD6, AAGAB</i>      | C/T | 0.237 | 1.194 | 1.156-1.234 | 2.97E-26 | 1.083 | 1.058-1.108 | 6.27E-12 | -0.681 | 0.155 | 1.10E-05 |
| 16p13.13              | rs35032408 | 16:11215424 | <i>CLEC16A, CIITA, RMI2</i>     | G/T | 0.785 | 1.152 | 1.111-1.195 | 4.59E-14 | 1.073 | 1.048-1.100 | 1.10E-08 | -0.568 | 0.169 | 7.91E-04 |
| 16p12.1               | rs3785356  | 16:27349168 | <i>IL4R, NSMCE, IL21R</i>       | C/T | 0.297 | 1.122 | 1.087-1.157 | 5.69E-13 | 1.036 | 1.014-1.058 | 1.24E-03 | -0.641 | 0.147 | 1.30E-05 |
| 16q12.1               | rs2066844  | 16:50745926 | <i>NOD2, SNX20, CYLD</i>        | C/T | 0.048 | 1.194 | 1.121-1.272 | 3.52E-08 | 1.049 | 1.003-1.097 | 3.76E-02 | -0.743 | 0.306 | 1.54E-02 |
| 17q21.33              | rs28406364 | 17:47454507 | <i>ZNF652, PHB</i>              | C/T | 0.377 | 1.108 | 1.076-1.142 | 1.39E-11 | 1.036 | 1.015-1.057 | 6.55E-04 | -0.489 | 0.140 | 4.81E-04 |
| 19q13.11              | rs10414065 | 19:33721455 | <i>LRP3, CEBPA</i>              | T/C | 0.934 | 1.207 | 1.133-1.287 | 6.37E-09 | 1.108 | 1.064-1.155 | 1.01E-06 | -1.078 | 0.291 | 2.12E-04 |
| 21q22.12 <sup>f</sup> | rs11088309 | 21:36464631 | <i>RUNX1, SETD4</i>             | C/G | 0.143 | 1.039 | 0.997-1.083 | 6.82E-02 | 1.079 | 1.050-1.109 | 4.83E-08 | 0.063  | 0.189 | 7.38E-01 |

<sup>a</sup>Cytogenetic band. <sup>b</sup>SNP position, Genome Reference Consortium Build 37 (hg19). <sup>c</sup>The gene in which the SNP is located is indicated first, followed by the previous gene and the next gene; for intergenic SNPs, only the previous and next genes are shown. <sup>d</sup>Alleles are shown as non-risk/risk alleles, where the risk allele is the allele associated with increased asthma risk. <sup>e</sup>RAF, risk allele frequency in UK Biobank. <sup>f</sup>Not reported in previous GWAS. <sup>g</sup>The SNP with the smallest p-value differs in the childhood onset GWAS and the adult onset GWAS at the same locus; both SNPs are shown.

674 **Figure Legends**

675

676 **Figure 1. GWAS of childhood onset and adult onset asthma.** Miami plot  
677 showing results for the childhood onset versus controls GWAS (blue, panel A)  
678 and adult onset versus controls GWAS (red, panel B). Each point corresponds to  
679 a SNP; the y-axes show the  $-\log_{10}p$ -values from the childhood onset GWAS  
680 (panel A) and adult onset GWAS (panel B). The x-axis shows the position of  
681 each SNP along the 22 autosomes. See appendix Figure 6 for the age of asthma  
682 onset Manhattan plot.

683

684 **Figure 2.** Forest plot showing the odds ratios (ORs) and 95% confidence  
685 intervals from the childhood onset (blue) and adult onset (red) GWASs, and  
686 betas and standard errors (gray) from the age of onset GWAS for the 61 asthma  
687 associated loci. Left panel: Childhood onset specific loci (top) and adult onset  
688 specific locus (bottom); right panel: Shared loci. Loci within each group are  
689 sorted by OR in the childhood onset GWAS (largest to smallest).

690

691 **Figure 3.** Age of onset effects (ORs) for lead SNPs at three genome-wide  
692 significant childhood onset specific loci (1q21·3, 4p14 and 17q12), and three  
693 genome-wide significant shared loci (2q12·1, 6p21·32, and 11q13·5). The sample  
694 sizes for the age of onset bins are [0,5]: n=4,637; [6,10]: n=4,255; [11,15]:  
695 n=2,684; [16,20]: n=2,128; [21,25]: n=2,578; [26,30]: n=2,923; [31,35]: n=2,599;

696 [36,40]: n=3,571; [41,45]: n=2,967; [46,50]: n=3,266, [51,55]: n=2,544; [56,65]:  
697 n=3,694.

698

699 **Figure 4. Results of PrediXcan studies at non-HLA region loci.** Genes whose  
700 predicted expression was significantly associated with asthma in either the  
701 childhood onset cases or the adult onset cases are shown for skin (left panels),  
702 lung (middle panels) and whole blood (right panels). Values shown for skin  
703 combine both sun exposed and not sun exposed skin, showing the most  
704 significant statistic of the two. Results using gene expression in spleen and small  
705 intestine are shown in appendix Figure 8. The z-scores on the x- and y-axes are  
706 from transcriptome-wide tests of association with asthma using SNP sets that  
707 predict the expression of that gene. The diagonal dashed lines show the  
708 expected when associations are the same in the childhood onset and adult onset  
709 cases. The horizontal/vertical dashed lines correspond to z-scores  $\pm 4.84$   
710 ( $p=1.29 \times 10^{-6}$ ); the horizontal/vertical dotted lines correspond to z-scores  $\pm 1.96$   
711 ( $p=0.05$ ). Colored backgrounds correspond to the chromosome location of each  
712 gene (see Key). Upper panels: Genes that are associated with childhood onset  
713 asthma (no genes were associated with adult onset asthma). Lower panels:  
714 Shared genes associated with both childhood onset and adult onset asthma.  
715 HLA region genes (6p21.32 and 6p21.33) are shown in Figure 5.

716

717 **Figure 5. Results of PrediXcan studies of HLA region genes.** Genes in the  
718 HLA region whose predicted expression was associated with childhood onset or  
719 adult onset asthma are shown for skin (left panel), lung tissue (middle panel) and

720 whole blood (right panel). Results using gene expression in spleen and small  
721 intestine are shown in appendix Figure 9. The genes on darker shaded  
722 backgrounds correspond to shared genes; the four genes on lighter color  
723 backgrounds are age-specific. See Figure 4 for additional details.  
724

725

726 **Figure 1**

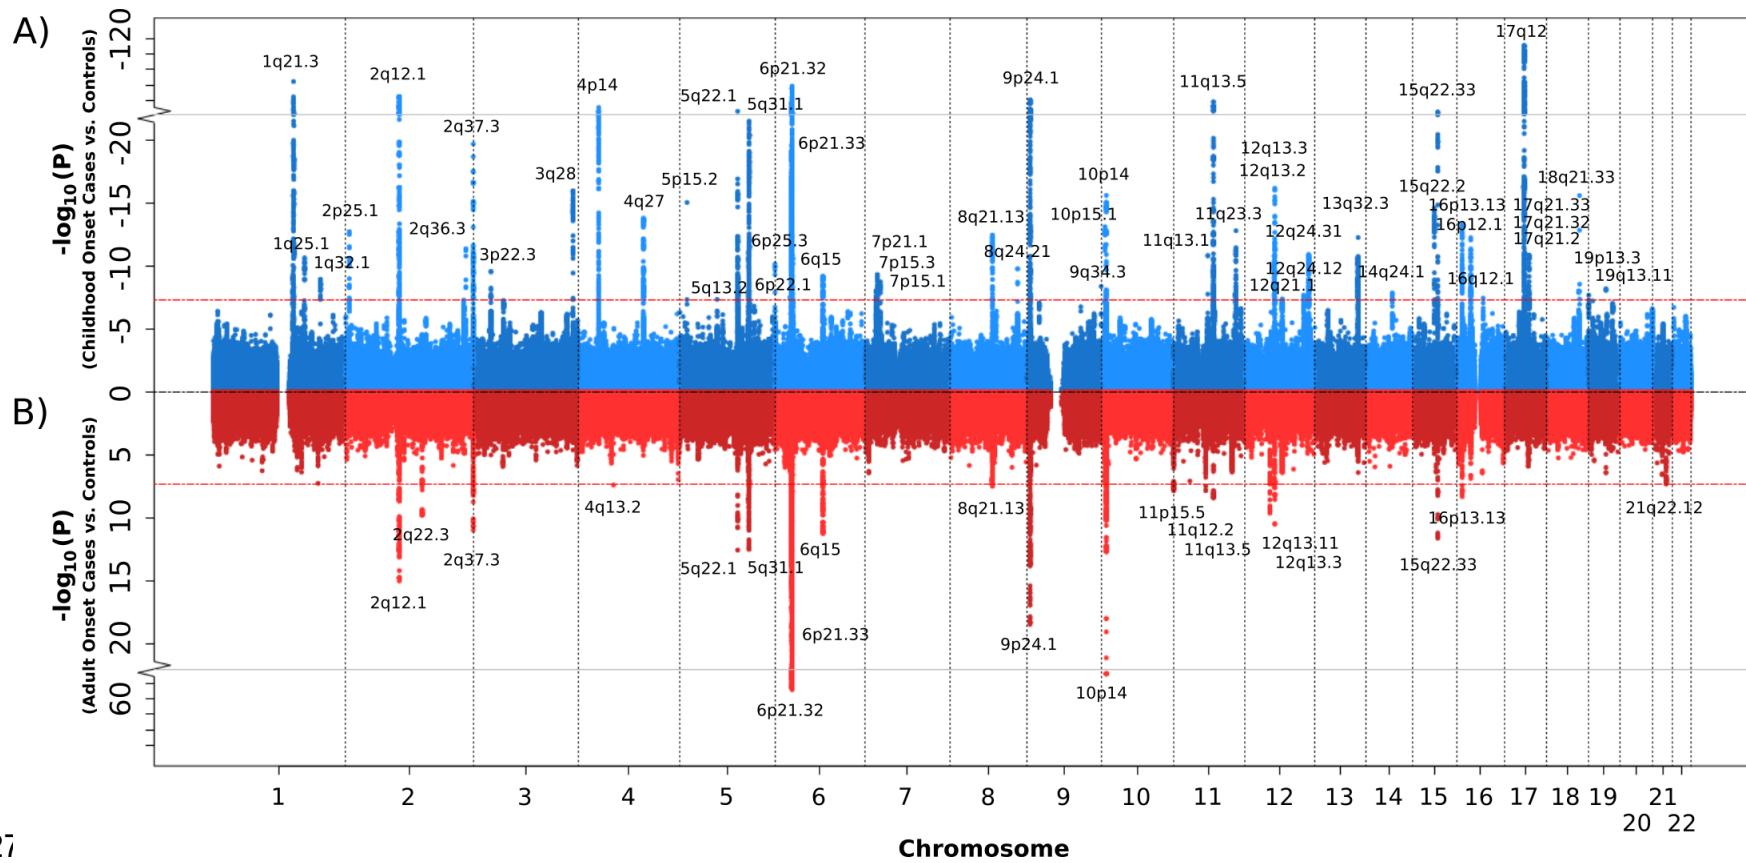

727

728

729

730 **Figure 2**

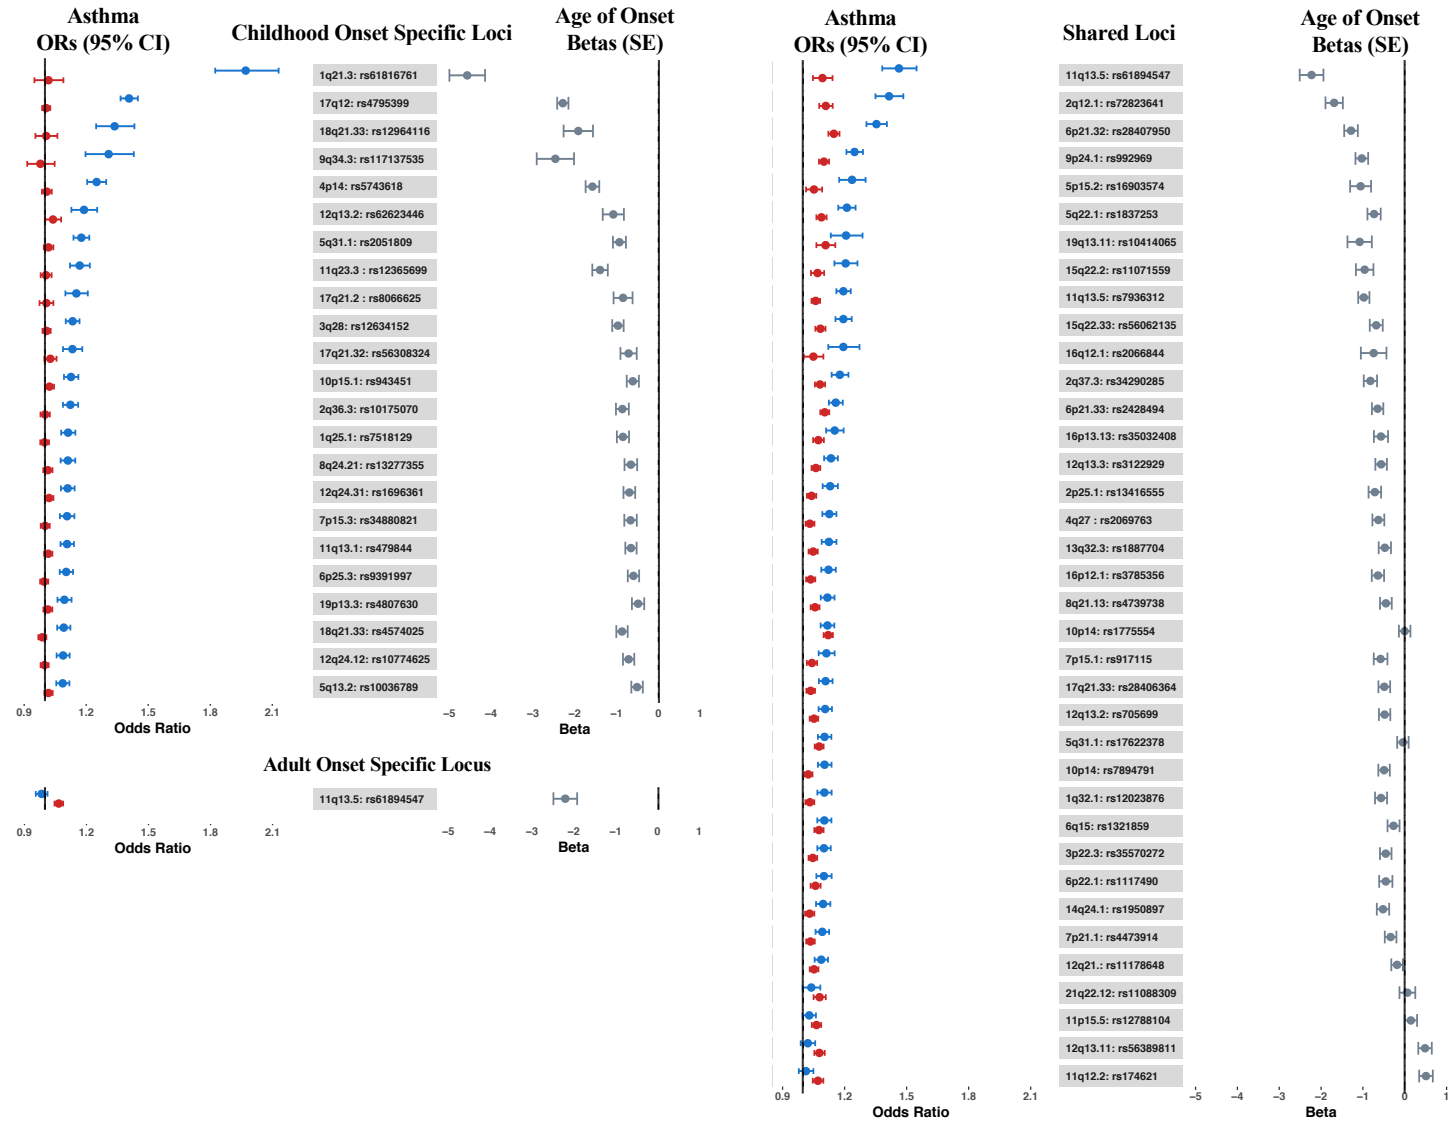

731

732 **Figure 3**

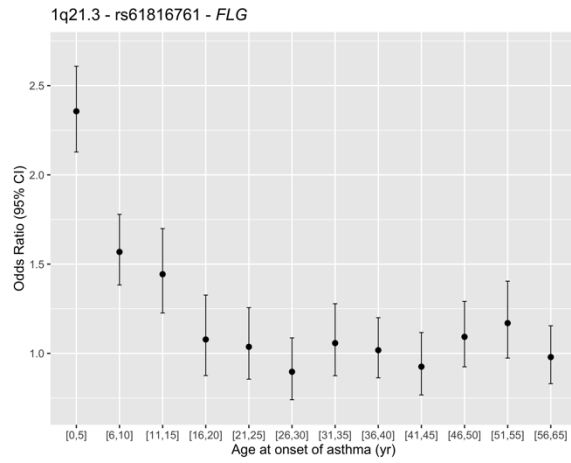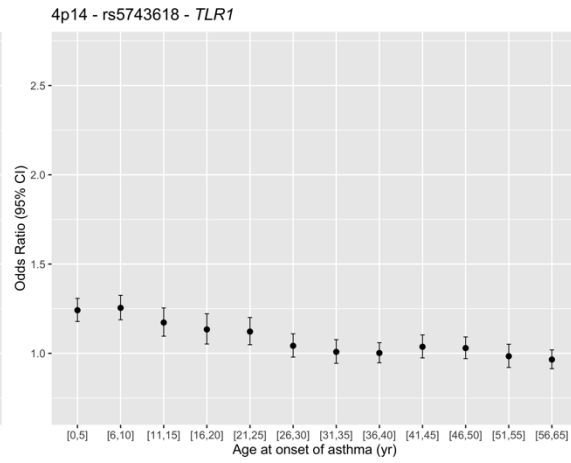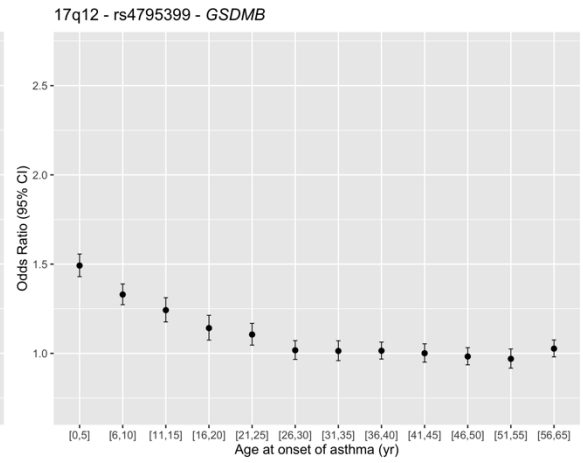

733

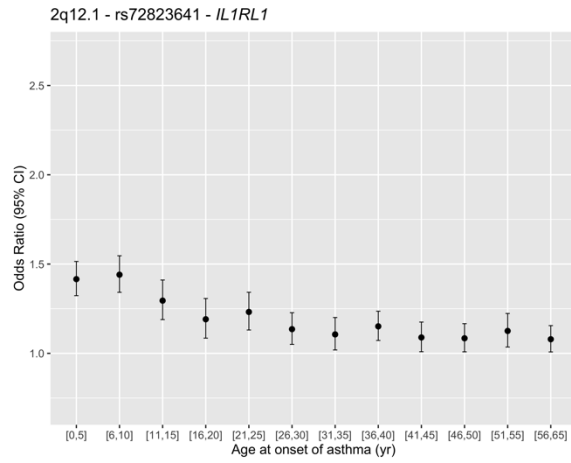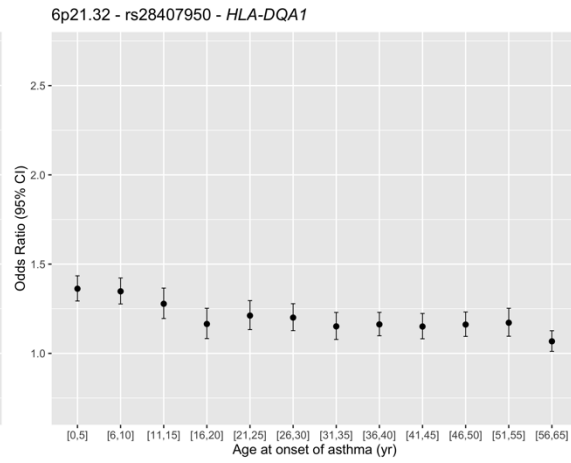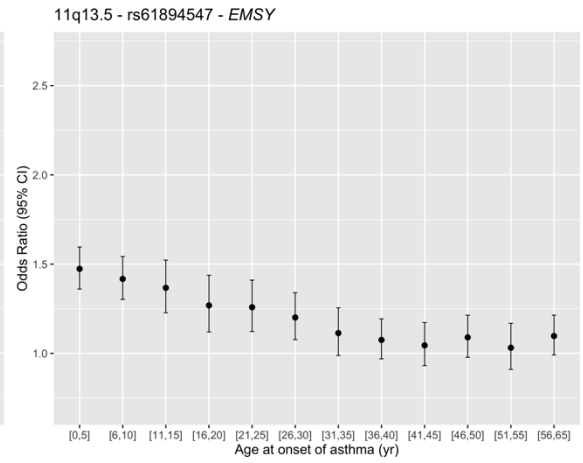

734

735



736 **Figure 4**

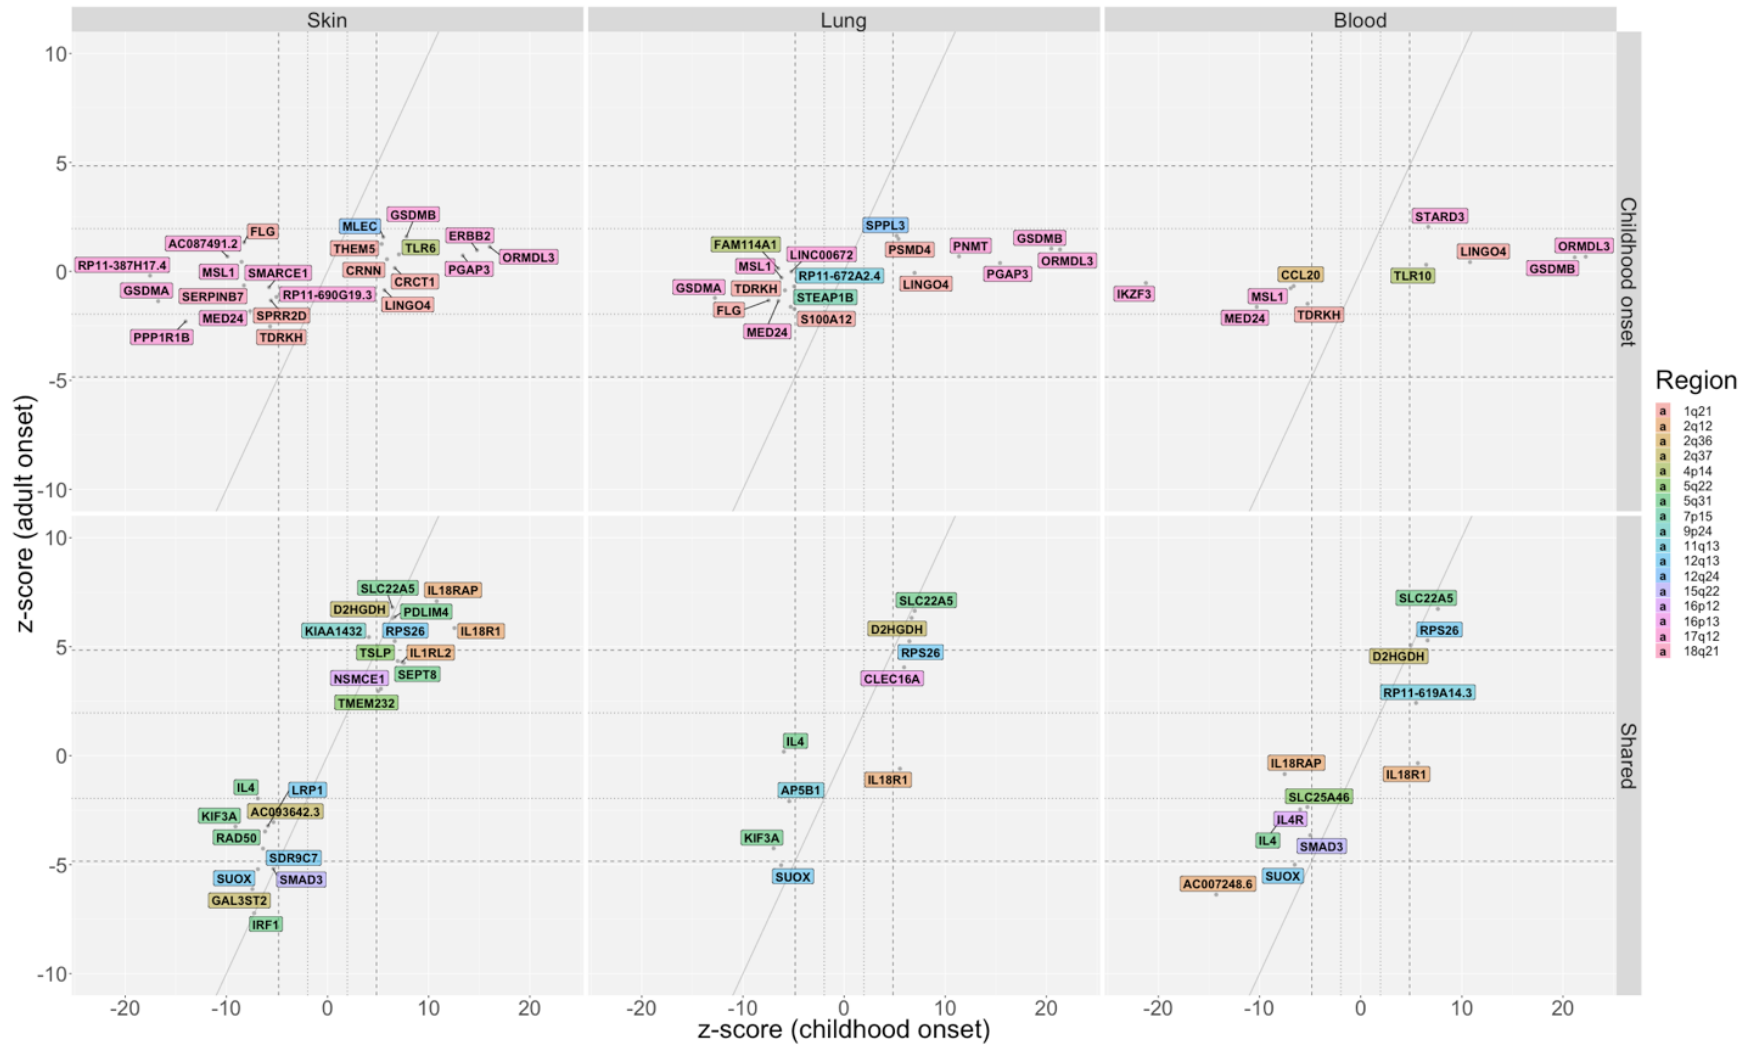

737

738

739 **Figure 5**

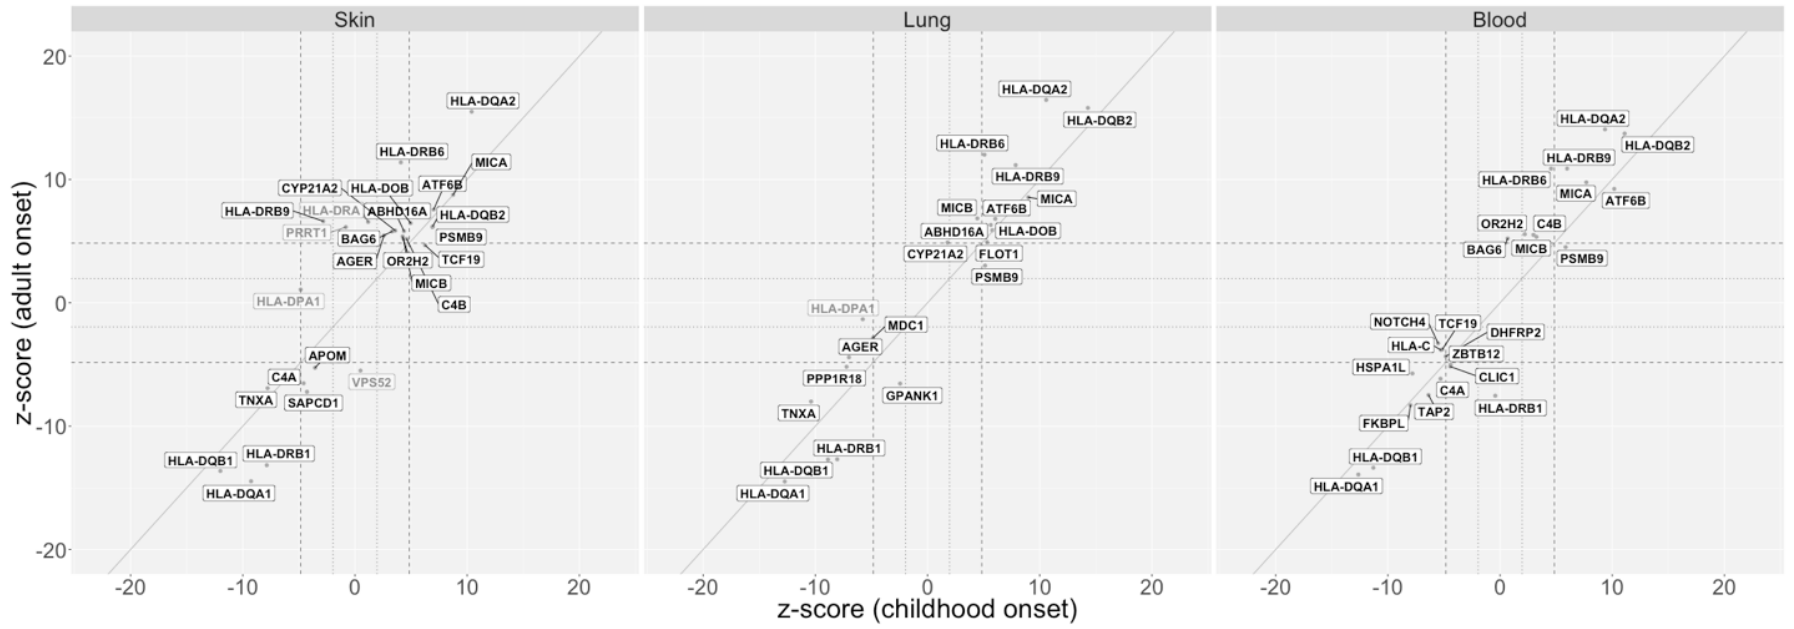

740
